# Supplementary material for: High-resolution analysis of four efficient yeast replication origins reveals new insights into the ORC and putative MCM binding elements
Source: PubMed Central journal article supplement — Nucleic Acids Res. 2011 May 9;39(15):6523–35. doi: 10.1093/nar/gkr301 (PMC3159467; doi:10.1093/nar/gkr301), 2011-05-09
Supplement: supp_gkr301_SupFigureCombine_041211.pdf [file supp_gkr301_SupFigureCombine_041211.pdf]

## SUPPLEMENTAL FIGURE LEGENDS

**Suppl Figure 1.** Linker scan analysis of *ARS319*. (A) Plasmid loss rates per generation are plotted for wild type *ARS319* (pFJ9) and mutant versions of pFJ9 containing GGTCGAC linker substitutions and additional mutations. (B) Detailed view of wild type *ARS319* sequence and mutant derivatives, marked as in Fig. 2B.

**Suppl Figures 2-10.** Overview of nucleosome positions generated from various genome-wide datasets (Suppl Table 2). Four individual nucleosome studies are highlighted using colored lines or ovals. The solid grey ovals indicate the consensus positions of nucleosomes determined from six genome-wide studies (see (1)). A vertical line indicates the dyad position for each positioned nucleosome. There are two clear discrepancies between (1) and the four nucleosome studies we highlight (2-5) that are indicated by grey ovals with a white asterisk. These two nucleosomes, one completely overlapping *ARS1* and the other overlapping the B2 element of *ARS309*, also had a low occupancy value of 22/100 and 45/100 in (1) are therefore not shown in Figure 7.

**Suppl Figure 11.** The average ATCG composition of the B-region of 228 conserved ARS elements identified by Nieduszynski et al. (6) is plotted as a percentage relative to distance from the EACS in bp. Nucleotide 1 in this graph is the last base pair of the 3' EACS, GTT.

## SUPPLEMENTAL REFERENCES

1. Jiang, C. and Pugh, B.F. (2009) A compiled and systematic reference map of nucleosome positions across the *Saccharomyces cerevisiae* genome. *Genome Biol*, **10**, R109.
2. Albert, I., Mavrich, T.N., Tomsho, L.P., Qi, J., Zanton, S.J., Schuster, S.C. and Pugh, B.F. (2007) Translational and rotational settings of H2A.Z nucleosomes across the *Saccharomyces cerevisiae* genome. *Nature*, **446**, 572-576.
3. Eaton, M.L., Galani, K., Kang, S., Bell, S.P. and MacAlpine, D.M. (2010) Conserved nucleosome positioning defines replication origins. *Genes Dev*, **24**, 748-753.
4. Lee, W., Tillo, D., Bray, N., Morse, R.H., Davis, R.W., Hughes, T.R. and Nislow, C. (2007) A high-resolution atlas of nucleosome occupancy in yeast. *Nat Genet*, **39**, 1235-1244.
5. Yuan, G.C., Liu, Y.J., Dion, M.F., Slack, M.D., Wu, L.F., Altschuler, S.J. and Rando, O.J. (2005) Genome-scale identification of nucleosome positions in *S. cerevisiae*. *Science*, **309**, 626-630.
6. Nieduszynski, C.A., Knox, Y. and Donaldson, A.D. (2006) Genome-wide identification of replication origins in yeast by comparative genomics. *Genes Dev*, **20**, 1874-1879.

A

ARS319

10 bp

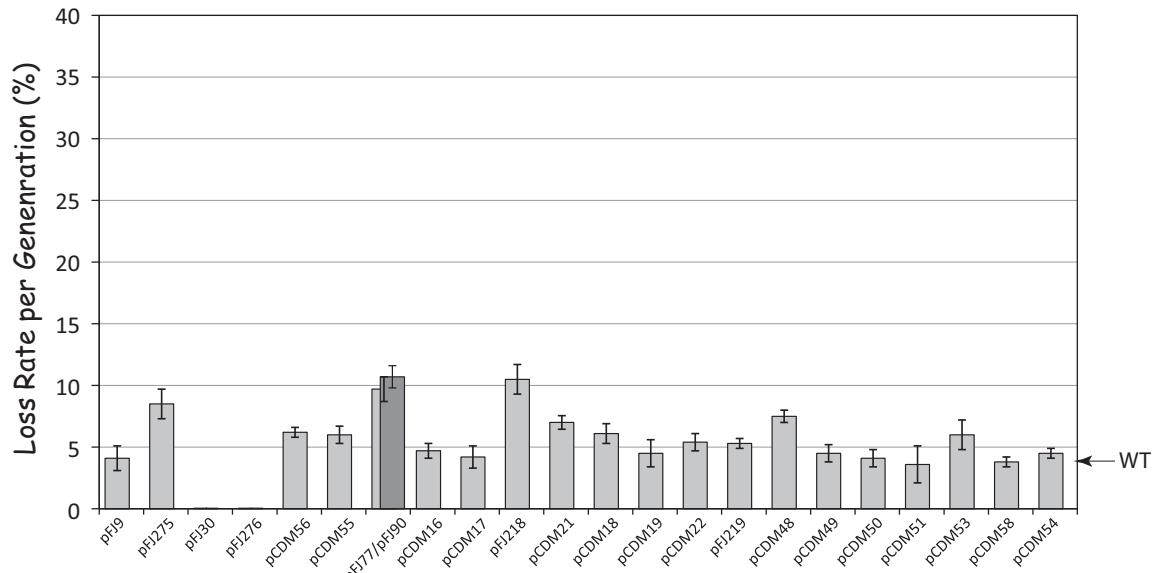

B

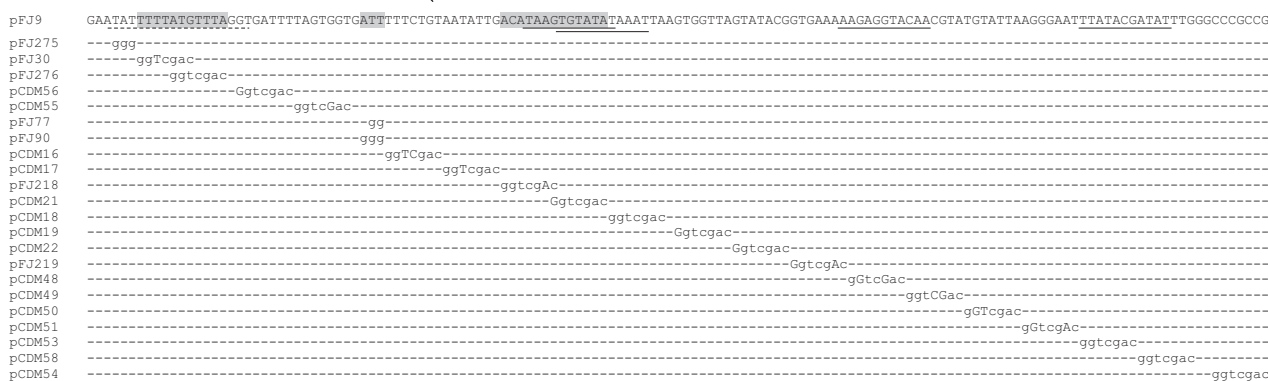

# ARS1

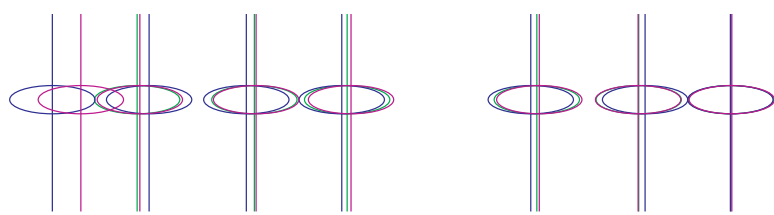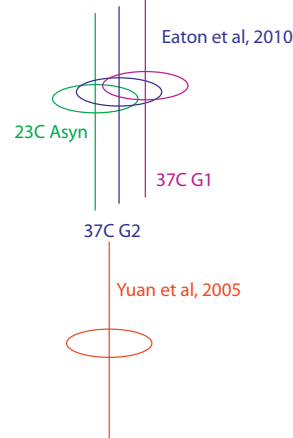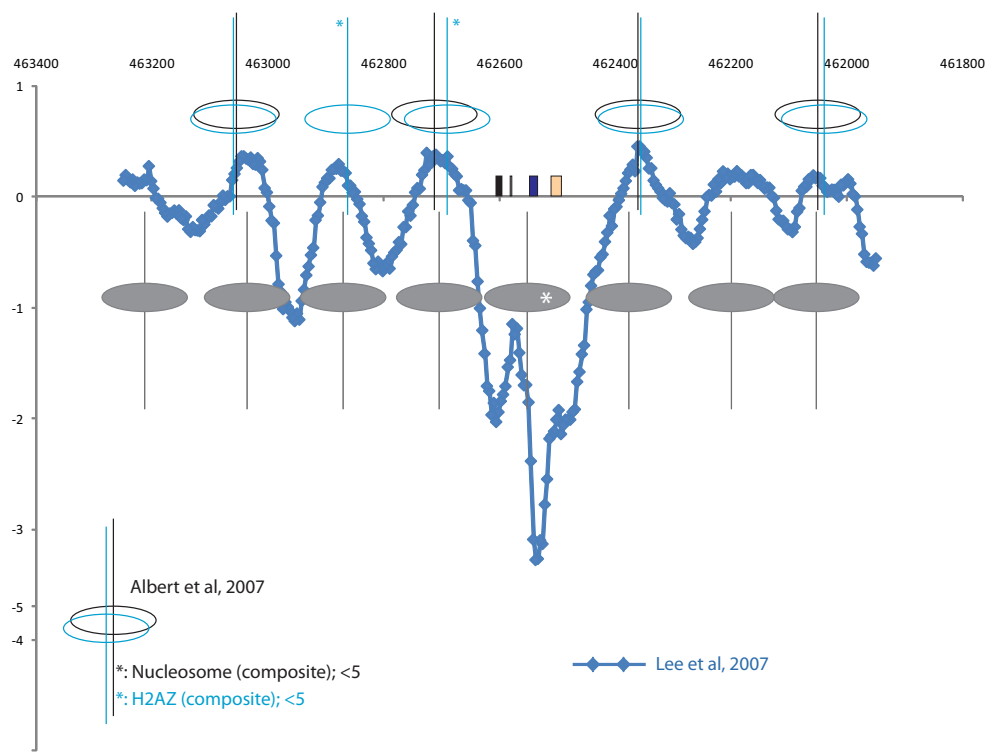

Jiang & Pugh, 2009

# ARS305

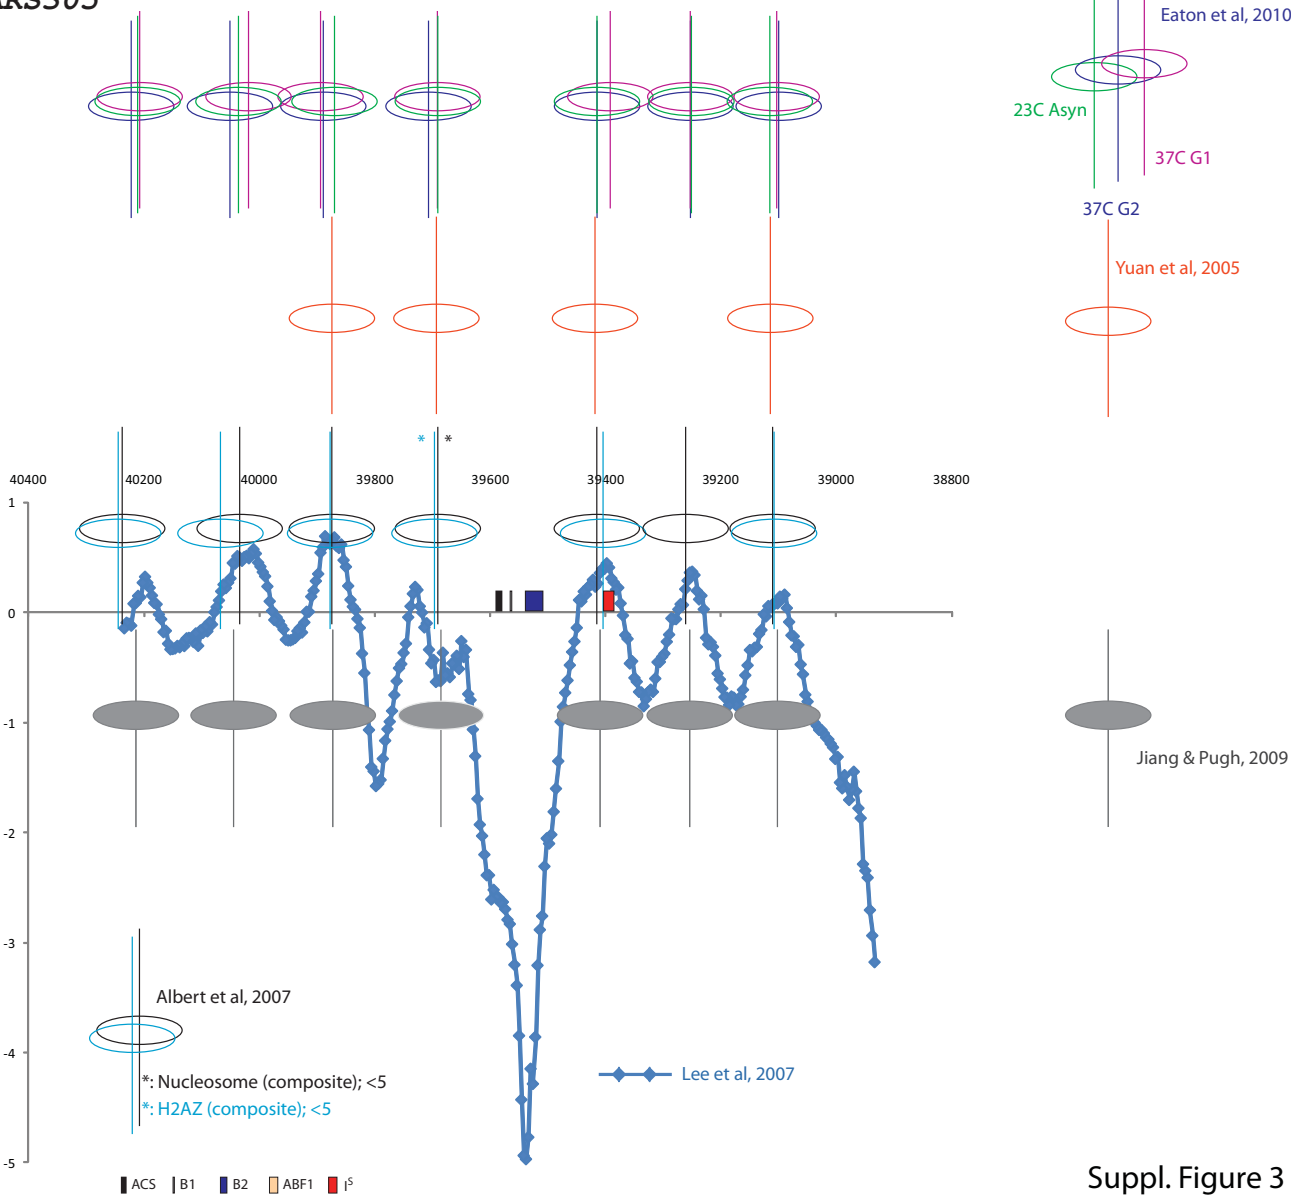

# ARS307

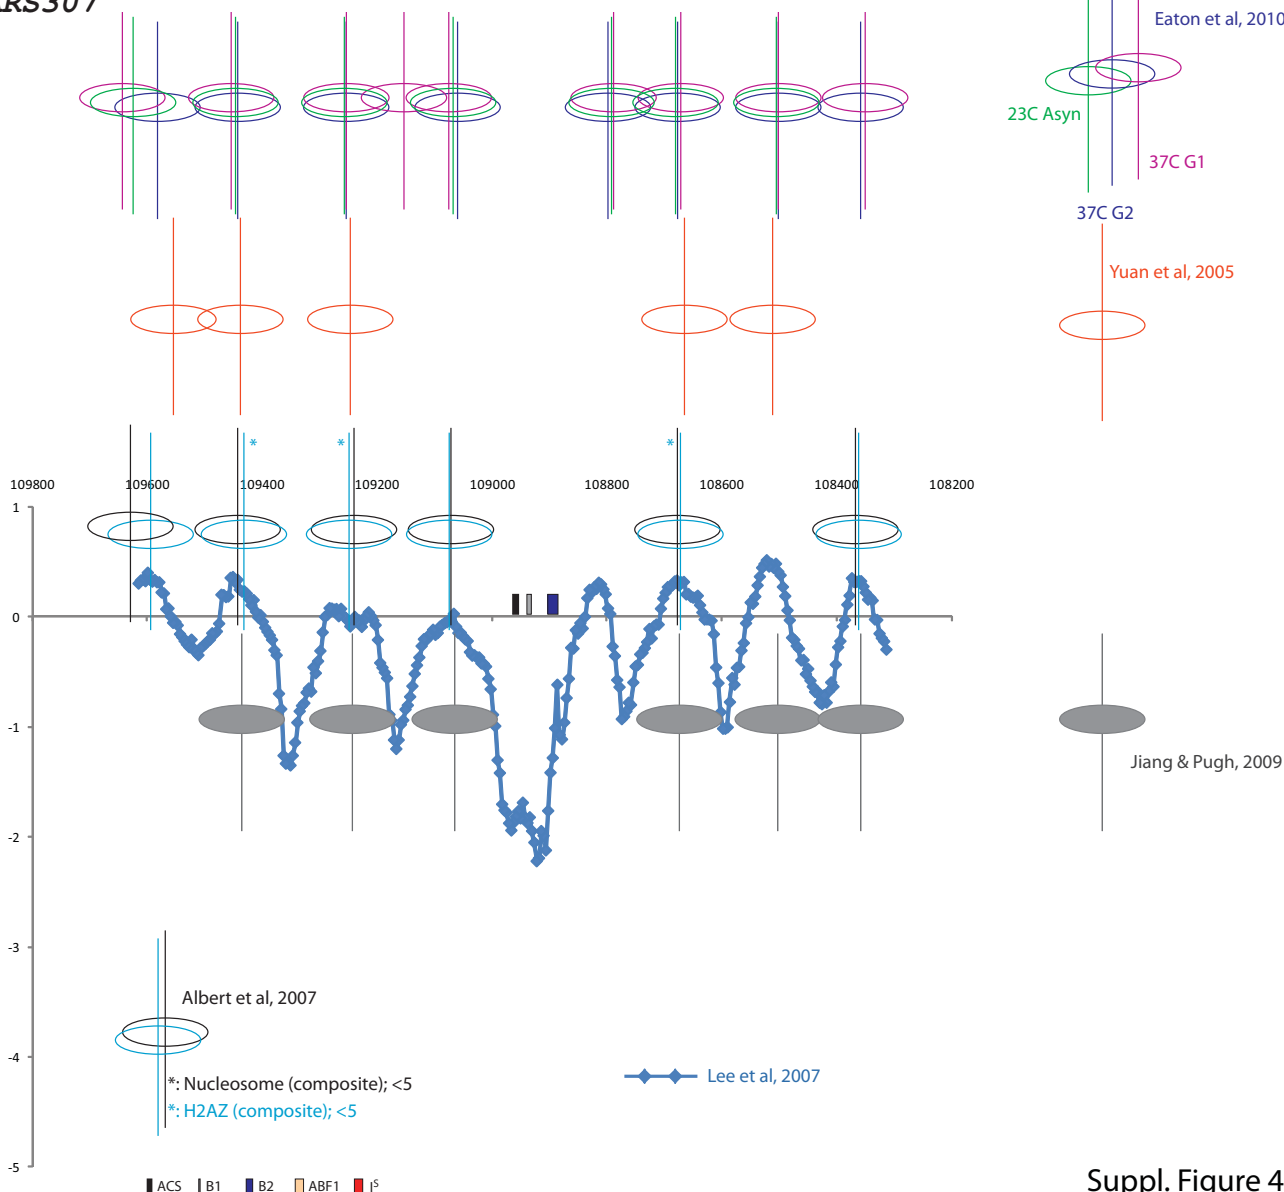

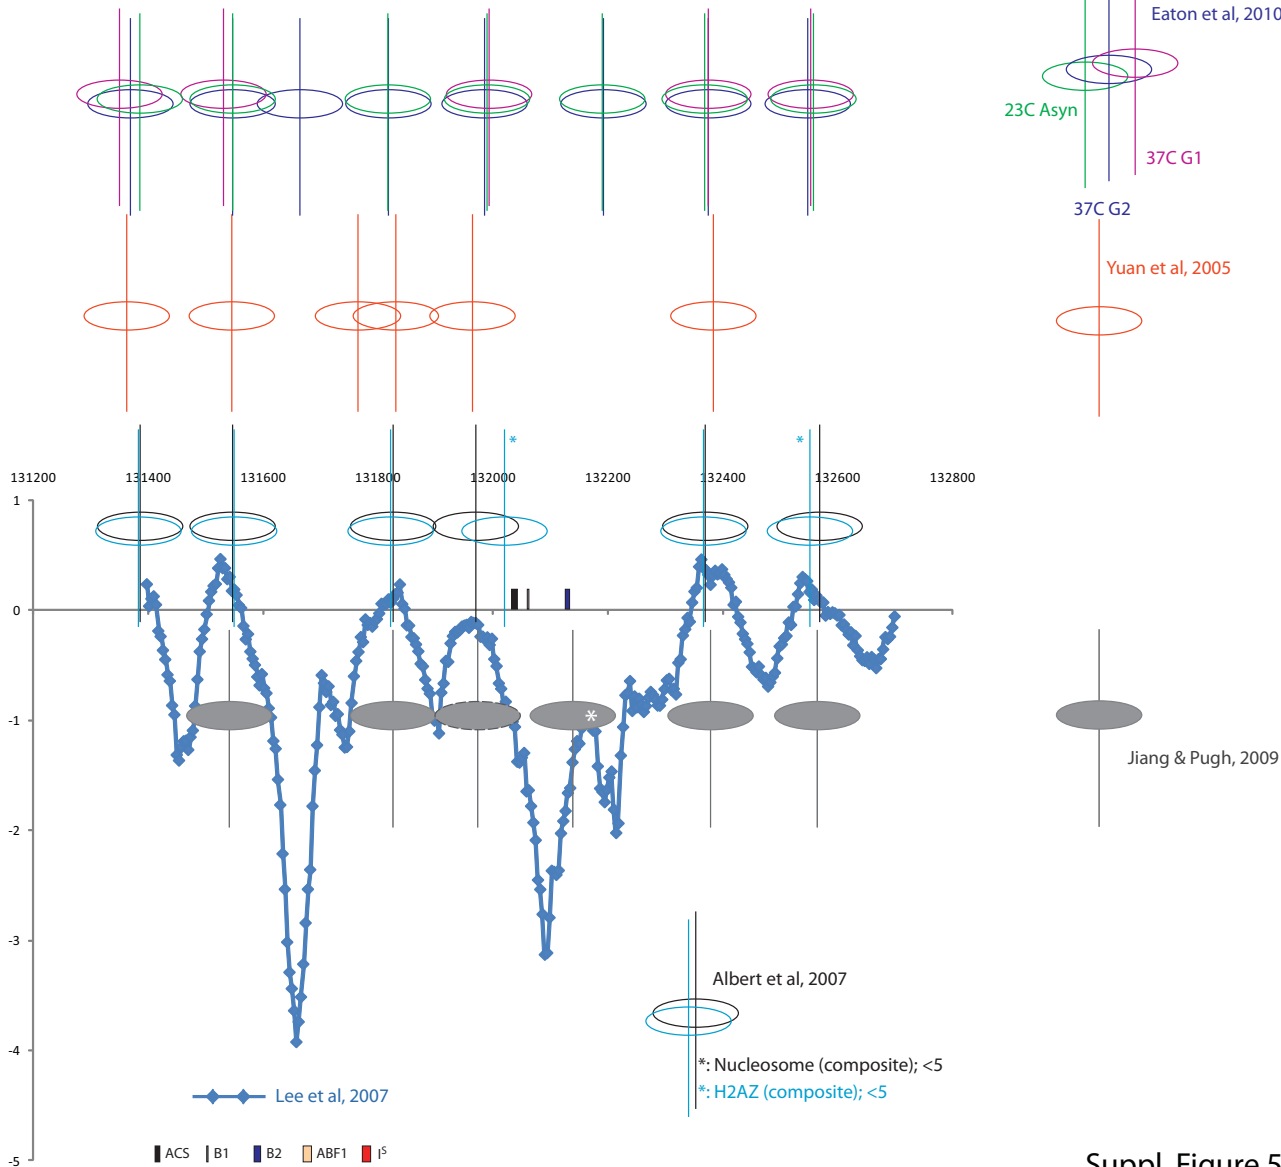

# ARS315

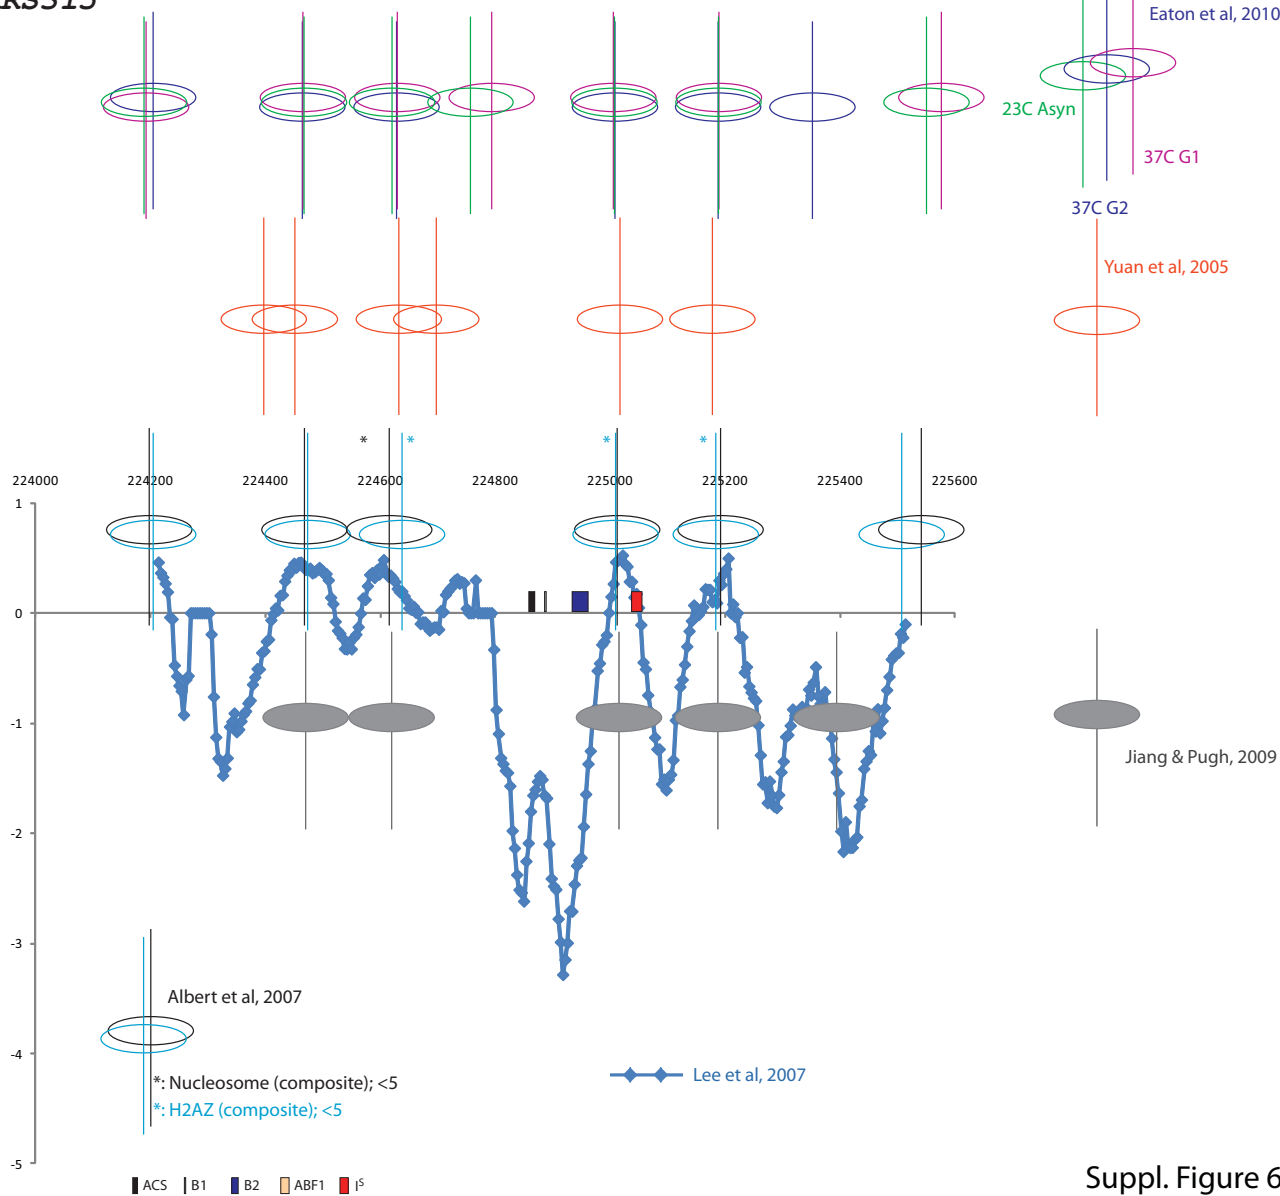

# ARS318

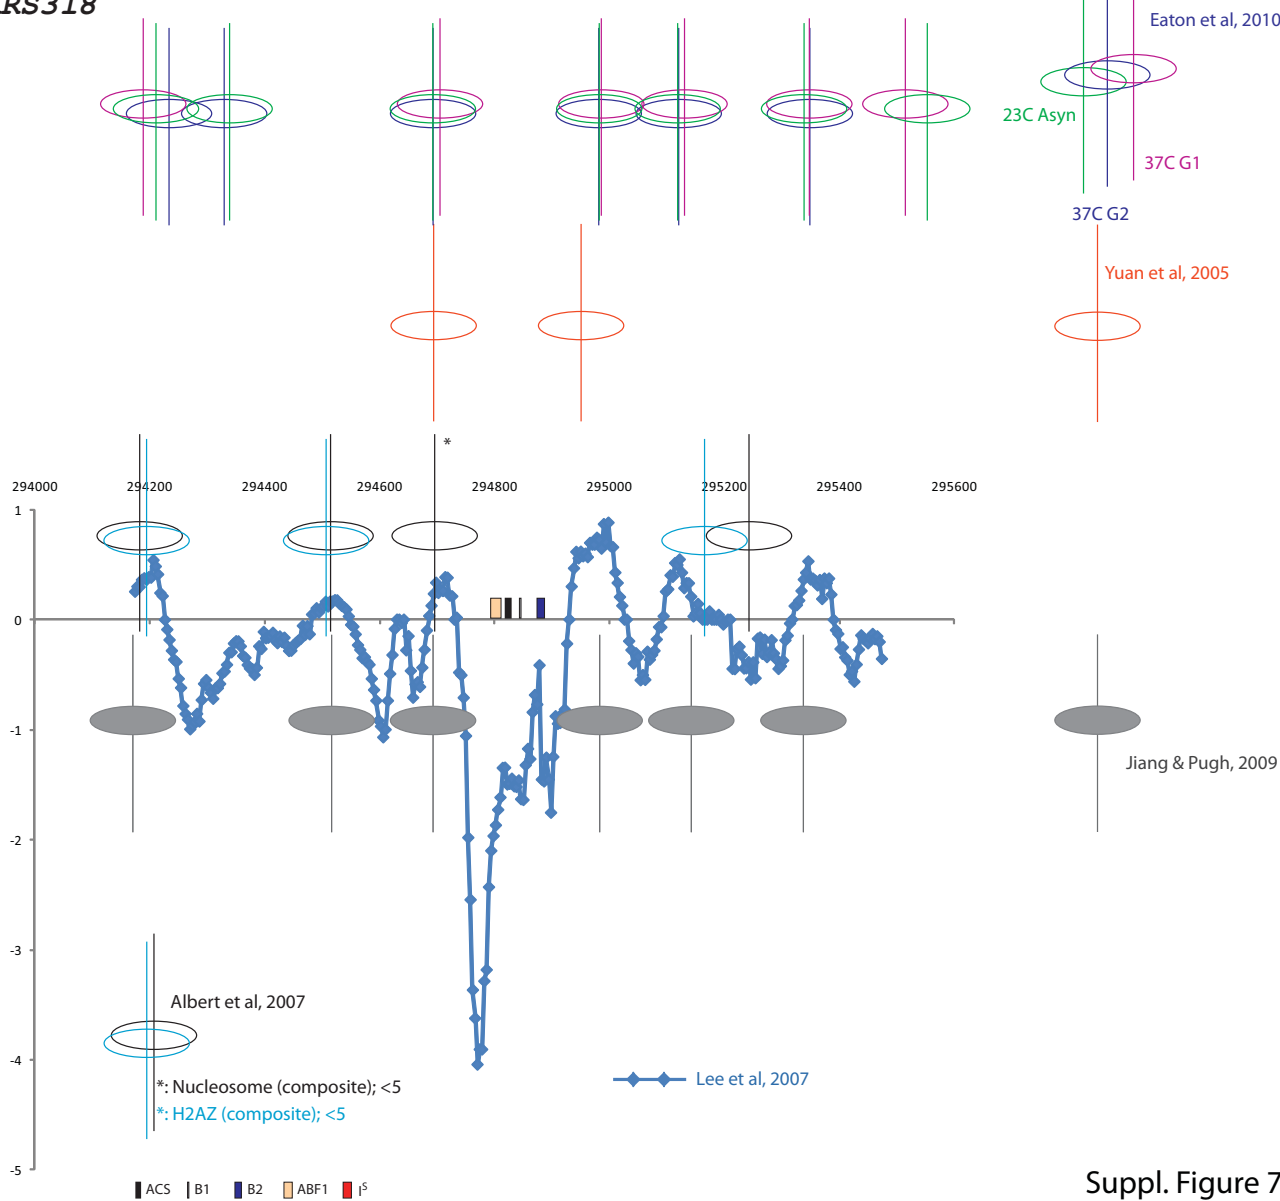



# ARS319

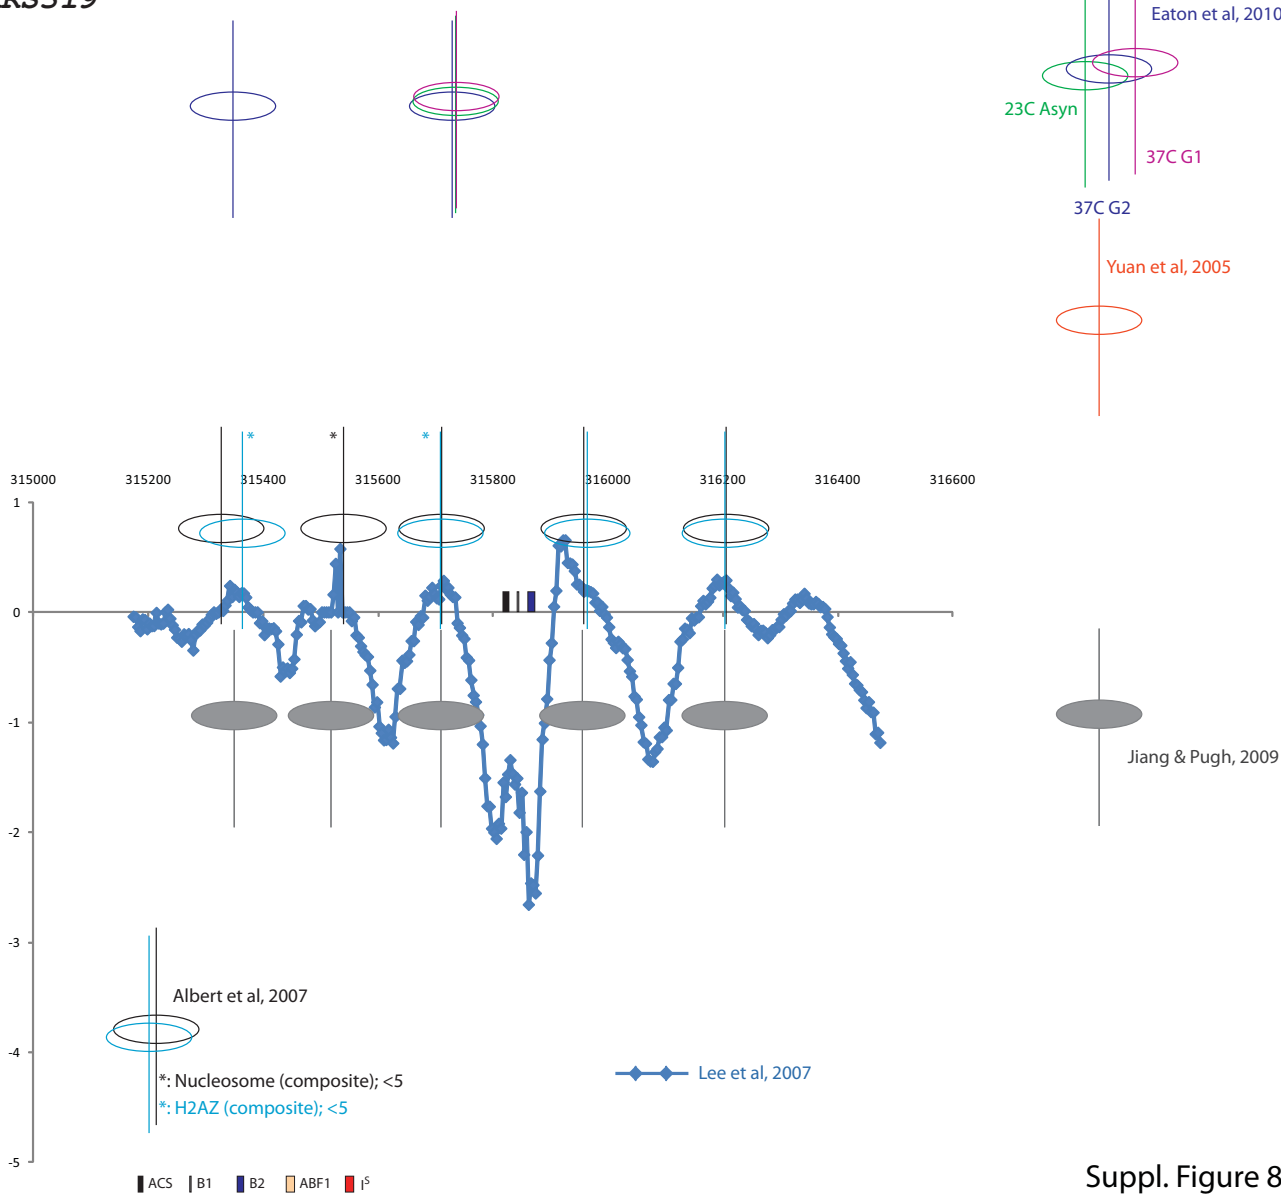

# ARS606

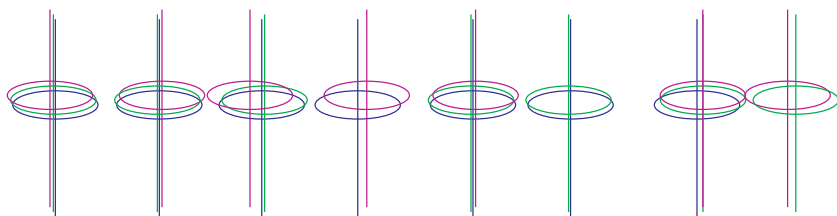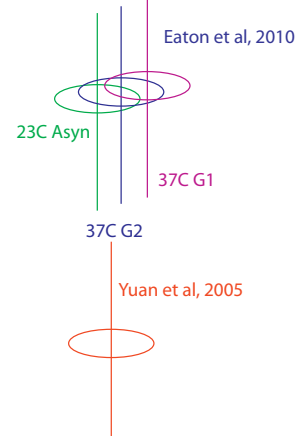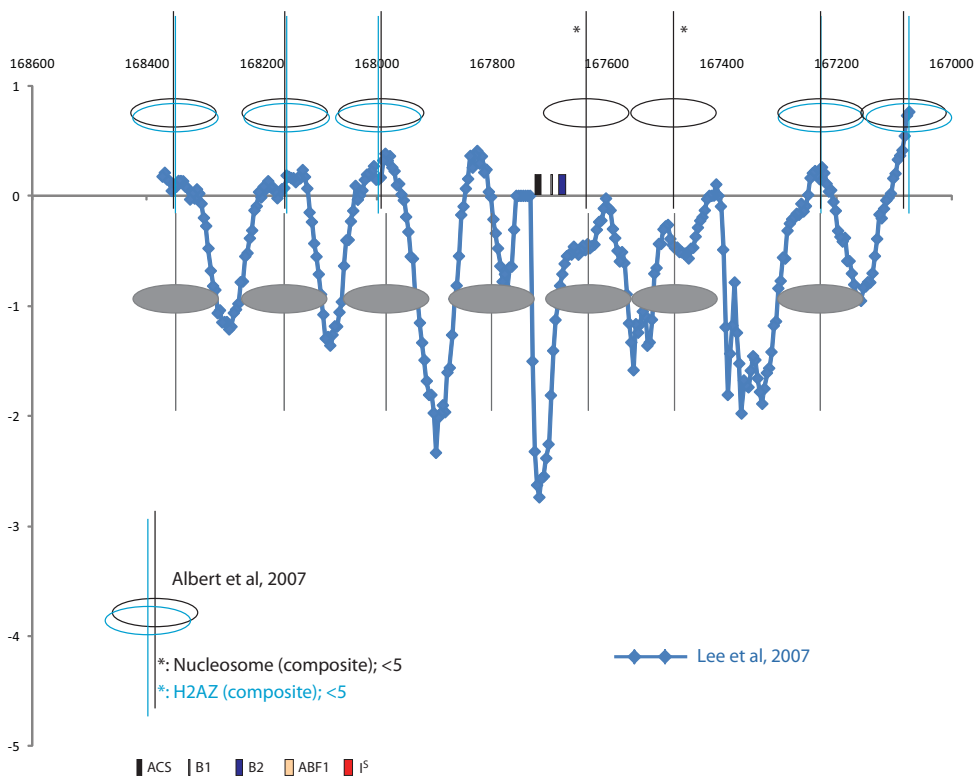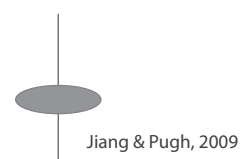

# ARS607

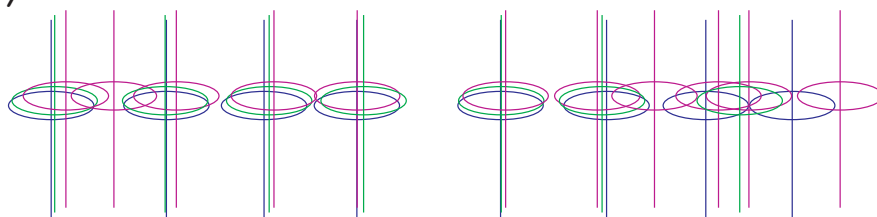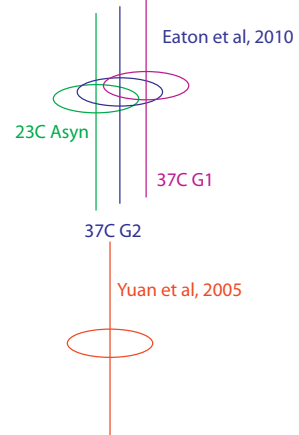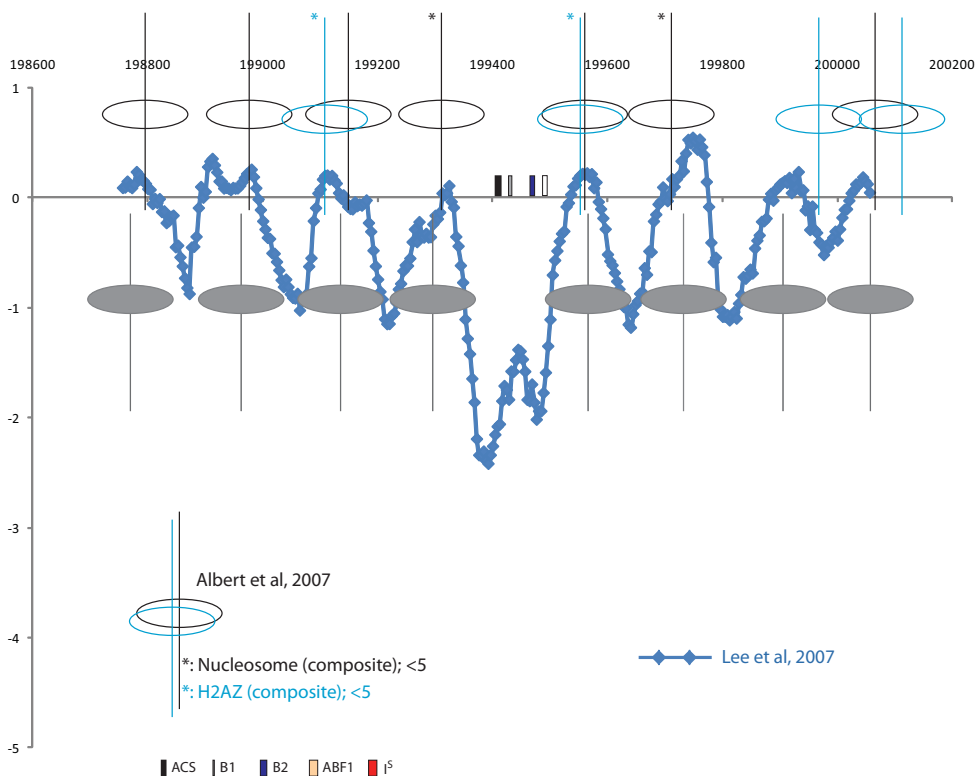

Jiang & Pugh, 2009

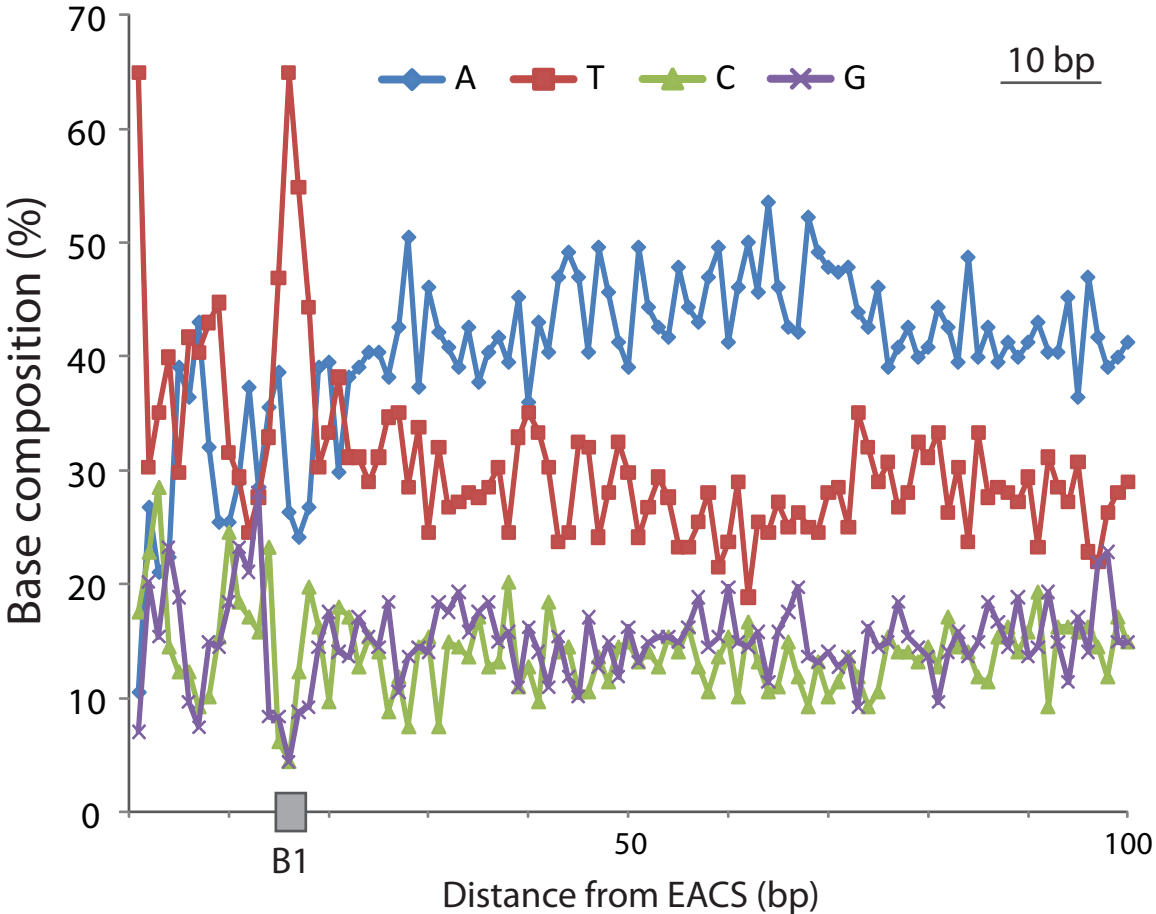



| Systematic name | proARS | Chr | Position / bp | proACS           | 100 nucleotides after 15bp proACS                                                                          |
|-----------------|--------|-----|---------------|------------------|------------------------------------------------------------------------------------------------------------|
| ARSIV-1058      | 431    | 4   | 1057887       | TTTTTTATGTTTATT  | CCATATATACACTTATAATTTTTTTTTTTTGGCGATTAAATATAAGTTTGGCTGGATACACGAAACATATATATGAT'AAAAATGGT'TGTCTCGAACAAAAAAAT |
| ARSIV-1110      | 431.5  | 4   | 1110132       | TTTTTTATATTTTTTA | TTCAAAAAATAACATTTCAAAAATTTAATTTTAATAAACTCATTTAAAAAAAACCTCTAAAAACATGAAGATAGAACTATAATAACGGCTT'CAAGTATTTCAAGA |
| ARSIV-1159      | 432    | 4   | 1159450       | TTTTTTTTCTTTTTCT | AAGCTTTTGAAGAAAAAGTTAACAGCTTTACCCTTCAAAAGTTATTGTTTTTGTAGCGCTAGAAAGCGAAGTAGGCGCTCTTTCTCGCATAAGCTACCTTAGGAG  |
| ARSIV-1166      | 432.5  | 4   | 1166170       | TTATTTACATTTTGT  | CGGAATATTTATTTCTTCTCTACAGAAAAATGAAAGCAACAGAATTGAATTTTCGACAAGTCAACAAACAACTTTGTAGACTTTTTATTACAAAAATTTATT     |
| ARSIV-1241      | 433    | 4   | 1240919       | TGATTTATATTTAGT  | CCAAATATTTACAGAAAAAAAAGATGCCTAAGCCTTGGGTCTTATTTTCGAACAAATCCATCCATCGGTAACAATTCAAAAAAGAATATTTTCGTC           |
| ARSIV-1276      | 434    | 4   | 1276267       | TTTTTCTCATTTTTT  | TATGTTTCCCCCAAAGTTCTGATTTTATAATATTTTATTTTACACAATTTCCATTTAACAGAGGGGGAATAGATTCTTTAGCTTAGAAAATTAGTGATC        |
| ARSIV-1303      | 435    | 4   | 1302755       | AAATATATATTTAGT  | TAATGAAAAATGGAATTAACGAAAGAGAAGTAAAAAAATGAACATAAACACATATAAAAATAACAACCTGATACACACTATCTTAGTTTATTATTTTAAAA      |
| ARSIV-1404      | 440    | 4   | 1404322       | CTTTTTATATTTTGG  | AATGTTTTTGTGCTAAAAAAATCATTATTCTGGGCGACATACAGTAAAAATAATTTAATATGAAACAAAGCGTATCATTTTGTAGACACCGATATCACG        |
| ARSIV-1462      | 443    | 4   | 1461899       | TTGTTTATAATTTGT  | AGCCAAGTTGTAGTGATAAATAAATTTAGGCAGATATTTCTTATATGCTTGTAGTGGAACTTCTAGCATATTCAGTATACTTGATATTAAGCCTTTAAC        |
| ARSIV-1487      | 446    | 4   | 1487091       | CTTTTTAAATTTAGT  | TTTTTTACTAGCTAATTCATTTACTAAACAACAAAAAGAAAATAGCACAAAATGGAAAGCAAAGAAATATCAATTAGGTCAAGAACCCTCCATCGAAGCT       |
| ARSV-59         | 507    | 5   | 59469         | ATATTTACATTTTGA  | TACTGTCCATCAGATTTTAGTCACTAACATCTAAGTTAAGGAAGTAAGAGATT'CAAGTCCGGTAAGGAAAAAAGAAAAAAGAAAAAAGAAAAAACAAC        |
| ARSV-94         | 508    | 5   | 94056         | AAGTTTATATTTTGT  | TGCTAGCGTTACGGTTATGTTTTTACGATACATATCGCCTAAGCAGGTCTCTGCGCCTAAAAAAGTAAACATATAAATTTGGGAAAGCAATATAATTTAA       |
| ARSV-146        | 510    | 5   | 145713        | AGTTTTTGTTTAGT   | TTTTTAATCTGGATATTCAGCAGCTATTTTCGGCAGTGCACACCCGCAAGAAAAATATACATAATGCTACAATACTCCTAAAAATATTATATAAAGTATGAA     |
| ARSV-174        | 511    | 5   | 173807        | AATTTTATATTTTGC  | CTTGAAAATTTAATCATGAAATTTATATCTGTAAAGGAAAAATTAGGGAATGAAATACAAAACAATACGAACATAATCCGTAAGGATATAAATAATCCAAATAC   |
| ARSV-212        | 512    | 5   | 212455        | AAAATTATGTTTAGG  | TAATGAAAAATAGTAAAAAATGCTTCCCTTAAGTTAATTATGAATTTCCCTATTAACACACATGCGTACACAAAAAAGTATACGGAAACTATATTAGA         |
| ARSV-288        | 514    | 5   | 287565        | TTATTTATGTTTTGT  | TCCAGCGGGCATCTTTCAATAAAAAATGAACTCAAGAAGAAGTAAATAATAACAAGCTATAATGGGTGGCCATTTGTGATCAAATTTGGAGTGAAACACGT      |
| ARSV-354        | 516    | 5   | 353582        | ATATTTACTTTTTGG  | TGCGGAAATCTGTAATATTTTAAAAACAATCTCATCCTTTTGAAAAAGAAACGATGAAGAAAAAATAATAACATACATTGTACCTTCACTAACACTTG         |
| ARSV-407        | 517    | 5   | 406902        | TTTTTTATATATAGT  | CCCCTCTCAAGTGAATTAGAAAAGTAAAGTATACACGCAAAAACAAGGGCGTAAATAAAAAGAAAACGAAAAAGCAACTAAATAAAAGCTTACATCCAAGT      |
| ARSV-439        | 518    | 5   | 439101        | TTTTTTAAGTTTTGC  | GCCTTTAGCTCATGTTTAGTTTCTGGTGGGGGAAGCGGTAATTTATTTTAAAGTAGCCAACATAAGCAAATATATGGAGAAAAAGAAGAATACCGTCGGA       |
| ARSV-550        | 522    | 5   | 549585        | TTATTAATATCTTGT  | TATGATTTCTTGTTTTAGCAGCTCCAAAAGAAAGGAATATTATAATATAATTTGTTGTAATTCGGAAAAAATATTTAAATTAATGTTGATATGCGTA          |
| ARSVI-168       | 606    | 6   | 167731        | ATATTTATATTTTCG  | TTTGCAATTTTCGCAATTTTAAATATGTCACAAAAAAGCGCCACAGAATTATCAAGAAGACCAACCAATCAATAATAAATTTCCGCAAATAACATTATT        |
| ARSVI-199       | 607    | 6   | 199401        | TTGTTTATATTTAGT  | TACGTTGGGATCAAGTTTTTAAAAAAGTAGATCTGGAGTGACAAAAAATAACCAGCGTAAGGTAATATTATGGATATGCTTTGGAAGAAAAGAAT            |
| ARSVI-216       | 608    | 6   | 216469        | TTTTTTACTTTTAGT  | TTTCTTCTATGCGCAAGCTTTTCTATTGGCTGCCAAATAGAAAATTTATTGAAATATGATTACATTACAATATTTTATTTGTCTTATGAAAAGTAAACATCA     |
| ARSVI-256       | 609    | 6   | 256374        | TTTTTTATGTTTTTT  | CCGGAATTTGGCTAAAATTCACAAAAAAGAGCATAAAGCGAATTTGAATTTGCTCGCCAAGAAAACGCACTGAGAGGACGATTGATCCTCCAGACAAGAT       |
| ARSVII-64       | 702    | 7   | 64457         | TTTTTAATATTTTGT  | TTCTCGTTTTGCTTATTTAATTTTGTGACATGTAATAATTACGAAGCCTATTGGGGCCAAATGAAAGTAACTAAATATAACAATAGTCTTTGTAGTT          |
| ARSVII-112      | 704    | 7   | 112127        | TTTTTACGTTTATG   | TCTATTTCAATGCAATTTACGTGAAAAATAAAAAGAACGCTACCATAAAAAATGTTAAAAAAGTGTAAAAAATGGTCCGAAAAAGTAAAAAAT              |
| ARSVII-163      | 707    | 7   | 163240        | CATTTTATAATTTGT  | TGTTACAAAACAGTATTTTACAAAGTCATAATAAACGTTTCAAAAAACAACACAATATTTAAAAAGAAATGGTATTAGGATCCGACATGACAATTAAGTATGATC  |
| ARSVII-204      | 710    | 7   | 203975        | TTTTTTATATTTATT  | AAAAGAATAAAAAGTAAAGTGCAGAAAAGAAAAACAACATCATAAAAAATATGAAAAGAAAAAAGGCAATGTTAGTGTATGAAGGGAGAAAAAATACCGTA      |
| ARSVII-286      | 714    | 7   | 286007        | TTATTTACTTTTAGT  | CCGTATACTTTTATTTTGTTTTGTAGACAATCTCGAAGAACAACAAAAAAGATAAAAAACAGAAAAGATAAATGTGCACTCTTTTGTACCTCGTTCTGCTA      |
| ARSVII-353      | 716    | 7   | 352864        | TTAATTACGTTTAGT  | TTTCTACTGAAACTTTTTTTTTTAAAAAGACCTTGAGAATTTTCATCTCGAGAATAATGAAGACCAATATATAAGTAATGAATCATAAAAAGTACAAGAGCAG    |
| ARSVII-389      | 717    | 7   | 388847        | TTATTTAAGTTTTGT  | TCCTAATTTATGATTTAGTATTTACTGGTCTGCAAAAAATAGGAAAGGTAATAAATAAGATTTCGGGTATATTATACATTATAAATGAGAAGTAAACCGGTT     |
| ARSVII-421      | 718    | 7   | 421284        | AAATTATTGTTTAGT  | TTTGATTAGCTTTACTTTAATTCGCACAAAAAAGCCTGCATTTGTCACGAGAATTTGAAACATATACAAAAACAATTTGAAATAGAAAACAAGCA            |
| ARSVII-485      | 719    | 7   | 485113        | TTATTTATGTTTTGC  | CGTAAGATCGATACTTTTCTTATTTCTCATCAAGAAAACAACAACTGCCAAGAACTAAGAAAAGAAGAGCCGTAAACAATGCTTTGTAACCGAAGTATGAA      |
| ARSVII-509      | 720    | 7   | 508909        | ATTTTAATGTTTGGT  | TGTGAATTTGAAAGAATACCATTTCGGGCACGCAATAGTTATGAACTTAACCGAGCTCAAATAATTTAAAGATAAAAAGATAAAAAGATAAAAAGACA         |
| ARSVII-569      | 721    | 7   | 568661        | GTATTTATATTTAGC  | CCCTCCTCAGTCTTTTGTTCAAAAACGTGAAGCAGAAGCTCTTGTGTGACTATTTGAAAAGTATCGCTATAGTAATCACCAGAACTACAAAGTTC            |
| ARSVII-575      | 722    | 7   | 574702        | GTATTTATGTTTTGT  | CATTTCTTTTCTACATAATCTTGAAACTAGGTAGATCTACAATTTGAAAAGTAAATACTAACATTATTTACTAAATTTAAGTTAGAAATCGGCACGAAAAA      |
| ARSVII-660      | 727    | 7   | 660002        | TATTTTATGTTTACT  | TATGTTAACCTGCATTTATTTCCATAAATAACAAAAGGCAAAAAAGTAAACAAATGAAGTTATTAGGAAAACAATAAAAAACAATATCGAGAAAAAACGCAC     |
| ARSVII-715      | 728    | 7   | 715315        | TTGTTTATATTTTGT  | TTCTATAATAATGTATTTGAAGATATAAAACAACATAATTTTACTGTTAACATTTAGGCGCAACAAAAGGACGATCTTTTTTTTATTTATCACAAAGTTAAAG    |
| ARSVII-778      | 729    | 7   | 778015        | TTTTTTACCTTTTGT  | TCCGTTATTGATTTTTTCGCAGCAAGGTTGAAAGCTTCAAAATTTGAAAATGAAATTAAGACGTAGAGATGAAAAACAGCGATGAAATTACTTTTTTATAGCTT   |
| ARSVII-835      | 731    | 7   | 834667        | TGTATATAGTTTAGT  | TACCATTTCCGTACTTTGGATGTAATAAATAAAGAGAGACATTATTTTTTAGTTGCGAATACATAACAGCGAATGTTTCATGGGGAAAAAGTTAAAAAC        |
| ARSVII-888      | 731.5  | 7   | 888415        | ATTTTAATATTTTGT  | TCTTTAGTTTTTAAAAATTCAGAAGAGAAAAAATTTTATTTTGTCAACAGGAAATAAAAACATAAAAACAAGAAAAAATAAGATTTGCAATTTCTGCCGCT      |
| ARSVII-978      | 733    | 7   | 977906        | TTTTTTAATTTTTTT  | ATATTTTCCATCTTTTGTAGTGAATATAGAGGTTATATAATGAAAGAATATATAAGAGGTCATAAAAAATCATTAAAAAATGCGAGTTTCAGGAACATAT       |
| ARSVII-999      | 734    | 7   | 999470        | TTTTTTACTTTTTGG  | GCTACATTAATCTTGAAAAAGTTTCAATGTTTTGTTATTTCTTTCTCACATACTTTATAAAAAAAGATAAATTTTTTAAAAAATAAATAAACAAGTGG         |
| ARSVIII-8       | 802    | 8   | 7754          | ATTTTATATTTTAGG  | TGATTTTAGTGGTTATTTTCTATAACAAATATTGAAAATAAGTGTTTTTGAAATTTAGTGGTTATTGTATGGTGTAAAGTGATAAAAACATATGCGAAAAG      |
| ARSVIII-64      | 805    | 8   | 64300         | AATTTAATTTTAGT   | TATTGATTTCAATGAAACAAAAGGAAACTGACGGCTTCTTAAAATAAATATATTTAACATGAAACATTTAAAAAATTTGTCACTACACAGAGAGAAAAT        |
| ARSVIII-134     | 807    | 8   | 133530        | ATTTTAACATTTAGT  | TTGTGATTTCCGGTAAAAGGGTAGTGTGTTTTTTTGGAGAGCCTTTTCTGACGGACAAATGGTTCGAGGAAATATAAATTTATATTTAGTAATACGCAAT       |
| ARSVIII-169     | 809    | 8   | 168596        | ATTTAGACATTTAGT  | TTAGTATTTCTAGGTGCTTAAATAATGAATATTGTCTATAGATGACTAATCATAAATGAACGAAAAGAAAGAAATTCAGAGGGCGATAACAACTTCCGCGG      |
| ARSVIII-246     | 813    | 8   | 245789        | TATTTTATGATTAGT  | TGCAAAACTTGAAAAACAATAGAAATTTTATCACATAAATGAAAGATAATGAACTCTTTTTCAGTCACTTATGATCCATGTTTTTTGAAAGAAAAGTTTACGA    |
| ARSVIII-392     | 818    | 8   | 392253        | CTTTTCATGTTTTGT  | TGTAGAGAGCCATTTAAAAACAAGATGTTTACCAGAAAAACAAGAAAGATCAAATAAGTGAAGTAAATGAAATGCTGTACCTTCCAATTTCTCGAACT         |
| ARSVIII-448     | 820    | 8   | 447792        | ATGTTTATGTTTTGT  | GAGTAAAGTCAAGAATTTGTCTTCTTGTAAAAACTACAAAAATAATGTATGCAAAATAGTATAGCAAGATCATTTTAAATAATTAATGTTATAAACGTT        |
| ARSVIII-502     | 822    | 8   | 501945        | GTTTATACATTTTGT  | TTCTTTTTTACCAATATTCAACTTCTGAACACATAGATTTTAAATTAAGATACAATTTGGCGAACTTAATTTGCAACGATTTTACATGTAAGAAAATTTGTG     |
| ARSVIII-556     | 824    | 8   | 556137        | ATTTTACGTTTAGG   | TGATTTTGGTGGTGTATTTTTCTATAATATTGAAATAAGTGTATATAAATTTGAGTGGTTAGTATATGGTGAAGAAAAGTGGTATAACGTATGTATTAAGAGCA   |
| ARSIX-106       | 909    | 9   | 105966        | TTATTCATGTTTTCT  | TTAATTTATCGAGCTTTTGAAGGTGAGGTAGTTTAGGAAAGTGAAGGCTGATAAGTAAAAATTTGGATTTTAGGGAAAACTAGATCCAGGATTGGTACTATTT    |

| Systematic name | proARS | Chr | Position / bp | proACS          | 100 nucleotides after 15bp proACS                                                                          |
|-----------------|--------|-----|---------------|-----------------|------------------------------------------------------------------------------------------------------------|
| ARSIX-136       | 911    | 9   | 136287        | CAGTTTATGTTTTGT | TTACTTTGGACAGCCAAAAAGAGAAAAAGAAAGGTGAAAAATTTTTTATGTGATCTCTTCAAAGAAATTTAGATACTTTAAATGATGCCGTACGTCTTTGTT     |
| ARSIX-175       | 912    | 9   | 175170        | TGTTTTATGTTTTGT | CTGGAAAAACATATAGTACGGATATTTTTGAAAACTTTGAAATAATATGTAAATTTATGTAAAAAAATTAAGAACCATTATAAAAAAATATTACAAAA         |
| ARSIX-215       | 913    | 9   | 214732        | TAATTTATGTTTTGT | AAAGAATAAAATGAGTATGATGAAGGAATCTTACCTCTATTAACCTATTTCTTCTTTTTTTTTTCTTCCGATAAGATGTGCGCGAATTCAATATGGAAGAAA     |
| ARSIX-246       | 913.5  | 9   | 245879        | TTTTTAATGTTTTGT | CCTTATAACCGCAGCTTATTCAAAGAAAAAAGAAAGTCCCATGCAAAAAATCTTGTCAATTATTGCGAATGGATATATCAGTGAGACCTTTTTAAGGTTGTA     |
| ARSIX-248       | 914    | 9   | 247751        | TTTTTAATGTTTTGT | CGTCACAACCGCAGCTTAAATAAAAGAATTCACGCTAGATTTCATGCTACTATCACGAACAATACGTACCAATTAAGCTTTCTTGGTGTAAATAAAAAAG       |
| ARSIX-342       | 919    | 9   | 342028        | TTTTTAATGTTTAGC | TTTCAAAAAAGCTAAAATAAACCATAGCGTTATTCTTATTATATTGATAGTAGAAGAGGAAGAGTGGTTATCTTTACTCAAATTAACGATTGCTTTTTAT       |
| ARSIX-357       | 920    | 9   | 357222        | ATTTTTATATTTGT  | TGCTTCAAAAAACAGTGCCGTATCCTTAATGAATGAAAAATCTAAAGAAAAATAAGTTGATACTAAAAATATAATGTCTTGAAGTATTTATGCGATATAT       |
| ARSIX-412       | 922    | 9   | 412000        | ATTTTAATGTTTTGT | CGTGAAGAAGAAGAAGTAAATAAAGTAGCGTGGGGATAGCGAAATGAAAAACATTCAATTATCAAAAACAAAACTTTTTAACTACATTTATACCTTTACTTTT    |
| ARSX-8          | 1002   | 10  | 7731          | ATTTTTATGTTTAGG | TGATTTTGGTGGTGATTTTTATGTAATATTGGCATAAGTGTATATAAATTAAGTGGTTAGTATATGGTGAAAAAGTGGTATAACGTATGTATTAAGGGCA       |
| ARSX-68         | 1005   | 10  | 67713         | TTTTTATTTTTTTT  | TTGGAATGTCGCGCCAGGACAAAAACATATAATTTATTAGCCTAGGCAGTAAATAGTAGGCGAAAAAGATTGAAAAGTATTATACATGTGGAAATTTAT        |
| ARSX-100        | 1006   | 10  | 99505         | TTTTTAATTTTTTTT | TTTTAATTTTTTTTTTTTCATAGACTTTTTATTTAAATAAATCACGTCTATATATGTATCAGTATATAACGTAAAAAACAACCCGTACAGTTAAACAAA        |
| ARSX-299        | 1010   | 10  | 298616        | TTATTTACCTCTTTT | CCCAGCAAGCGGGCAACTTCTTTAAGAAAAAGTAATCTTTTTTGTACGTGCAATTATCAAAGCTTGGTTACTATATTTAACATTATTGTTTAGTAACAGTA      |
| ARSX-337        | 1011   | 10  | 337048        | TTTTTTATGTTTAGC | TAAGTAAAAAGCAGCTTGGAGTAAAAAATAAATGAGTAAATTTCTCGATGGATTAGTTTCTCACAGGTAACATAACAAAAACCAAGAAAAAGCCCGCTTCT      |
| ARSX-375        | 1012   | 10  | 374639        | TTATTTATAGTTTCT | ATCTTTCAGCTTTCAAATAAATAATATATATGGCGCTTCATGAAAAAGAGAGCTAGCTACAGAAATATAAACAGTCATGGATGAATAGGCGGCGGCAGCTAT     |
| ARSX-376        | 1013   | 10  | 375580        | TTTTTTTTGCTTTTT | TAAAGACTATAAAAGTGTAAACTGTCAGTAAAAAATAAGACACCACAAAAACAATAAGTGAAGATAAAAAGAGCCTAGTGAAGTAAACTAATTCAAATGAG      |
| ARSX-417        | 1014   | 10  | 417089        | TTTTTTATATTTAGT | TTACTTTCCAGTCAATTTCTTTCCGCCCTTTGCATCTATAAATTTAAATAGAAAGGATAAAAAAGTGGTTATGAATAGGTAAATAATACTAGAGTAGGACGA     |
| ARSX-540        | 1018   | 10  | 540302        | ATTTTTACATTTAGT | AATATCTAATAACATATACACAAAAAGGGACAGATTTTTGAATTAATAAACAAGCGTAAATCAGTATTGCTCTTACCAGCAGTAGGGGGAGTTATCTA         |
| ARSX-613        | 1019   | 10  | 612772        | TTTTTTATCTTTAGT | TGCCATAAATACTATTTATTTTCGTCATTTTACAACCTCTTTTATATACACCATTTCGATTTCCCACGAAGTAAAATAATAATTCTATAAACAGATTTATCT     |
| ARSX-654        | 1020   | 10  | 654244        | TTATTTACATTTTGG | TCATTTGAAAAACTTTACTTAAAAAGACGAGGAAGAAACTGTAAATCCATAGTTTCGAGAGTTGAAGTGCCTTCAAACAAAAACTCCTGACTTTTTTTT        |
| ARSX-684        | 1021   | 10  | 683706        | TTGTTTAACATTAGT | TTCAAATTAACAGCTTTTGTGAGAAAATATATTTTGGATGAATAGCAGAAAATAGAAATCTGGAAATAAACAAAAACAGAGCCAAAATTCTAAGCTTAATA      |
| ARSX-712        | 1022   | 10  | 711661        | TTTTTAATGTTTCT  | TAGAAAAATTAAAAACTTCTCAATTAATGTAATAAATTTACTTGTGGCGATACTTAGAGGATTCAAATTTAACTAGTGTAAATATACGAACTGGTAA          |
| ARSX-730        | 1023   | 10  | 729813        | TTTTTTACGTTTCT  | CCATATTTGCAATTTGTTCTTCTTCAATCAAAAATAAATAAAAAAATAAATCACAAAAATGACTATAGTATTTTGGAGCCCAACATGACTGCGAAATTGCTA     |
| ARSX-737        | 1024   | 10  | 736905        | ATTTTTATTTTTCGG | TGTTATTTTCAAGTATTACTGCTTTTTGAATTGGTCTATATATATGGACATGAACCAGTGCAGAAAAGTATTCACTTTTCATTTCAGGACCAAAGATAATAG     |
| ARSX-745        | 1025   | 10  | 744632        | ATTTTTATGTTTAGG | TGATTTTATGTTGATTTTTTTGTAATATTGGCATAAGTGTATATAAATTTAGTGGTTAGTATACGGTGTAAAAGTGGTATAACGTATGTATTAAGAGCA        |
| ARSXI-56        | 1103   | 11  | 55865         | TCATTAATGTTTAGT | TCCGAGCGTGACGTTACTAACTGCGAAAAAGTTCTTTCGACTAGTAAATATCAAAGGCGAAAAACATAAGTATATGGGAGAATTATAACAAGTTAAGTGA       |
| ARSXI-98        | 1104.5 | 11  | 98386         | TTTTTTATGTTTAGT | GTATATTTGCTAGAAAAGAAACAAGATCTTTTTTGGTAGTGTAAATGCTTAAACTTTGTCTCTTTTTTCTTTTTTACTTTGGAAAAATGCCGACGCAAGAAC     |
| ARSXI-153       | 1106   | 11  | 153121        | ATTTTTACAATTTGT | CACCGAAATAGCAGTTTTTTGTTTAAATTTTAAACGCTATGGGGTAAAAATTTTGGGCCCAATTTCAACTGAAAAGAGAGATTTTTAAATATGATAAGATAA     |
| ARSXI-196       | 1106.3 | 11  | 196213        | TTTTTCATTTTTTGT | TTGTATTTTCCCGTTTTGAAAAACTCCCACTTTAATGCAGGACATCGTTCAAACAAGCTTTAAAGATTTGACAGTAAAAATCCTCACTTTACTCAAGACA       |
| ARSXI-213       | 1106.7 | 11  | 213308        | TTTTAAATATTTAGT | TATFGAATGATTAAATTAGAAGGATTGATCATAAAACAACAAGAGAAAACAAGAGTATGGGGGATAATTAGTACTTTTCACTTTCTTTTACCTGTGTACGGC     |
| ARSXI-329       | 1109   | 11  | 329499        | TTTTTTATGTTTTTT | TACGTTTTGAGATCATAAATATTTGAAAAATAAATAATCACAAATTCATAACAACCTCTTTTTTTTATAGATAAAGTAAAAACACAGTTATGTATGTAAAGTA    |
| ARSXI-389       | 1112   | 11  | 388662        | TTGTTTATGTTTATT | TGTAAAAATACATTTAATTTCTTTGAAAGTAAAAACTTTGAATTTCTGAAATAAATAAAAACTAGAGAAAAATTAACGATGAGGCATGCGACGGAAAT         |
| ARSXI-417       | 1113   | 11  | 416878        | AAGTTTAATTTTAGG | TGTCGGGAGAAACATTTAATCCCTTTTATGAATATAAATTTAAGTACTAAAAAATCACATAATTATACAAAGTAACTGCAATTTAAAGTACGTTTAA          |
| ARSXI-448       | 1114   | 11  | 447837        | CTTTTTATGTTTTGT | TCTTGATTTTAAACTACATTTAGTTTCAGCTCTTTTTTCACTTATTTTTGCACATGGAAGATCAAATACATGAAAAGTACACAAAAGAACAAAACAAAAGCC     |
| ARSXI-517       | 1116   | 11  | 516680        | TTTTTTACTTTTTGT | TATTTTATTTATGTTTTTCTAGGAAATGTAAAAATAAATCTTTTATGATAGACAGCGAGATGAAAACCTAATCTGTGTGAGCTTCAATCAATCAATATGATTT    |
| ARSXI-582       | 1118   | 11  | 581532        | TTTTTTACATTTAGT | TTCAATTTATGCAAAATTAGAGGGTATACAGTTGAGATTTTAACTTTGAATTTAAAAAGTGTACAGAGGAAACCGACGCAAAAAGGCTTGGTGACGCAA        |
| ARSXI-612       | 1120   | 11  | 612045        | TTTTTTATGTTTTTG | GCTCCTAGAGGTGAATATTTTTCTTTTTCTTTCGAGCTATATACTAAATATTAGTATATAAACAGCAAGAACTATAAACCTAAAAGTAGCCAAAGC           |
| ARSXI-642       | 1123   | 11  | 642412        | GATTTTATATTTAGT | TGGCGAACTAGCTCATCCTAATTATAAATAAATTTAATATATAGCATAAAACCGACAATAATGCGTGGGTGGTCTCCATGCCGAATTTGTGAACTGAATTA      |
| ARSXII-91       | 1206   | 12  | 91466         | ATTTTAACGTTTAGT | TCATCTTGCTGTGAATAATCTAAAAGTAAACAATGGACAAAAAAGTCCACTGGACGTCAAATCTTTTTTTTATTGTATTTGGGACATATGGCGTTGATAAC      |
| ARSXII-157      | 1209   | 12  | 156700        | GATTTTACTTTTTGG | AAGGGCTTTGGACAATTTAAAAGAAAGATAAATTTGAAAGTACCCCATCAAATGCTAGAATGAAATATTTAATATACTAAATTAAGGCTGGTATTTAAAAACGT   |
| ARSXII-231      | 1211   | 12  | 231250        | TTGTTTATATTTTTG | TTCAAAAAATGAGTTAATAATGATTTTTTTCATCTTCCGGCTTACCGGCTTTGAAAAATATTTGTTAAGACAACAGTGGATAAAAAATAAACTAAACAACCTCAAG |
| ARSXII-289      | 1212   | 12  | 289421        | AAATTAATGTTTTGC | TGCTTTTACTGTGCGGTTTAAACAGTTGATTTTTCCCAAAAAAAGAAAGTAAACAGCATCTATATAAAGAAGGATATAGATAACATGCACATTTTTCG         |
| ARSXII-373      | 1213   | 12  | 373328        | TTTTTTATATTTTCT | CCGTATTTATGAAAAATCCTCTTCGGTAAAAGCACAGAATTAGACTTGAAATGTAAACAATATAAGACAGACAAACCTTTATCGAAGATAGAAGTGTCTGA      |
| ARSXII-413      | 1215   | 12  | 412854        | TGTTTTTTGTTTTGT | TGTAGTATTCGAGCATTAAGGATAAAAAAGCTTGTGAATAAAAAATCTTTCGCTAAAAATCAATATAAGAAAATGGTAAGCAGCTGAAAGATAATAAGGT       |
| ARSXII-451      | 1216   | 12  | 450660        | TTTTTTATATCTTGC | TTATAAAGCAGAAGGTGATTTAATTTAATTTTCGCTGTGATACCATCCATTAACCTGAAAATTAAGTACAAACAGAAAATACGTTAGATAGTATGTTAACGAAA   |
| ARSXII-459      | 1216.5 | 12  | 459091        | TTGTTTATGTTTTGT | GTGATGATTTTACATTTTGCATAGTATTAGGTAGTCAGATGAAAGATGAATAGACATAGGAGTAAGAAAACATAGAATAGTTACCGTTATTGGTAGGAG        |
| ARSXII-513      | 1217   | 12  | 513085        | TTATTTATGTTTTTG | TCACAAACGCGCACATGTTTGTAGGGAGTAATGTCATTGTCAAACAAAACACATAAGAAAAACATGGTGAGATTATTAAAAAAGTGTATAAGTTTATAAAA      |
| ARSXII-603      | 1218   | 12  | 603110        | TTTTTAATGTTTATG | TTCAACATACCCGAAACACTACAAGACGGAAAAATACTAGAGAAAACATCAACAAATGAAAAAAGGCTACAATCCTCGGATGAAACTGATAAAAAACGA        |
| ARSXII-660      | 1220   | 12  | 659892        | CTTTTTATGTTTATT | TCATGGATTACGAAATTTGCTGGCTTTTTTATAGTGTACCGATGAGTTGCATGTACATATGTGCGAAAATAAACAAATACGGTAGTAAAACATGAATACTTCG    |
| ARSXII-745      | 1223   | 12  | 745115        | ATCTTTATGTTTTGT | TTGCCTTTACTGGCCAGAAATTTTATACTTATTTTTGAATAGAACACATTAAGTTCTACAGGTACCTGCAAAATATCGAGACAAAAGTTTGAACGAGAATA      |
| ARSXII-794      | 1226   | 12  | 794207        | AAGTTTAAGTTTAGT | TACGGGGTTAATGTAATGCGAAGGAACCTAAAAAGAAAGGCTGAAATAATCAACCAATAAACAAACCATTAAGAGGTTGAAATAATTATGATCAAAGAA        |
| ARSXII-889      | 1227.5 | 12  | 888741        | TTTTTTATGTTTAGA | TGTAAAAAATTAATTTTTTTTTTCAAATATGCTGCCGTGAAAAAGAAATCAAAATAGACGATTACACAATATTTTGAATAATTACATGAAGAAAACATTAATTA   |
| ARSXII-1007     | 1232   | 12  | 1007235       | ATTTTTATATTTTGT | GTTTGTCTAAGGTTAATCGTTTCAGCTAAGTTAAAGCTAAGTATAAGAAAGCAAAAAATACTAAATTTATACTAAATTTATAAATTTTTCGTACATAAATAATCA  |
| ARSXII-1014     | 1233   | 12  | 1013785       | TTTTTTATGTTTTCT | CGTTTCTTTTTCTTTTTTTTTGTTTTTATATCTTACACATTTTTAATACTAAAGTAAAAATAAAAAAATACGTAAGTTTCCCTTTGTTTTCTCCTCCTCT       |

| Systematic name | proARS | Chr | Position / bp | proACS          | 100 nucleotides after 15bp proACS                                                                          |
|-----------------|--------|-----|---------------|-----------------|------------------------------------------------------------------------------------------------------------|
| ARSXII-1024     | 1234   | 12  | 1024151       | TTAATGATGTTTAGT | TCTGAAAATAACGATTTTTTTAAGCGCTTGGCAATTTTCAACAAGAAAAAGGTGAAAAAAGAAAAATAAGATTA AACGATGAATGCGATTTTTTTGTTTCTGTTA |
| ARSXIII-32      | 1303   | 13  | 31767         | TAGTTTATTATTAGT | TGCCAAAAACGAAACATTTAACATGTGAATTA AAAAATACAAAAAAGCCTATTAACGATCTAAATTTATGACAAAAAGACATATAATTATTTTTAATGATGC    |
| ARSXIII-94      | 1305   | 13  | 94390         | TTAATTATATTTAGA | TATATATTCGTATTTTATTAATAATTAGGAGGAATAAAGTCCGACATTTTTTTTCAAAAAAATAATATTTTCAACAACGAAAAATCTATAAAATAAAA         |
| ARSXIII-137     | 1307   | 13  | 137321        | ATATTTATGTTTTGT | TAATCTCCTCTACCCCTTTCAATGCTTTGAAAAATACTTTCAACTTTTTTCGATTGGGTGATGAAAAAAGACAAATAGTGTAAAGGGTTCAAAAAATAAATAAC   |
| ARSXIII-184     | 1308   | 13  | 184017        | TTATATATGGTTAGT | TAACCTCTATGTTCCAACAAATACCAATAAAGATCGCGCAAGTGGTTTTAGTGGTAAAATCCAACGTTGCCATCGTTGGGCCCCCGGTTTCGATTCCGGGCTT    |
| ARSXIII-263     | 1309   | 13  | 263126        | TTTTTTATATTTGT  | GATAAAGGGATAACTCGTCTTGCCCTTCACTGCGCTTCGATTCTACTTTAGCTAAACTAAGCGTTACTTTGTTTTGAGAATCTCTCAGCCGTTAAATCAACG     |
| ARSXIII-287     | 1310   | 13  | 286845        | TTTTTCTTATTTAGT | TTTTGTAGGCGGCATAGTATTACTTGCAGATTTTTTTAAAGTCCCTGAGCCCCAAAGTTCCAAAGCAACAAAAAACATAAATCCTTTGCAGGAAAAGTA        |
| ARSXIII-371     | 1312   | 13  | 371020        | ATTTTATTGTTTAGT | TCATGATAAAAACTTCAAATCACTTTAATCTGGTAGACAGAGAAAACAAATCGAAACGAAAATAGAGA ACTACGAATAAAAAAATATAAGTGGAGAAG        |
| ARSXIII-468     | 1316   | 13  | 468236        | TTTTTTATTTTTGT  | TCCTAATTTTTTTTTTTTTTACATTTTATTAGCTATACACTTGGCGCAAGGATATTTTATATACCGGATATAATAGATAATTA AAAAGACTACTAATTA AA    |
| ARSXIII-536     | 1320   | 13  | 535769        | TAATTTATATTTAGT | TTAGGATATAGATTATCCTAGGCTTTAATATTTTAAATGGAAAAAACTACAATAAGATTGAAACAAAGAACTTTGGATAAAAAAACAAAACA ACTCTGTAG     |
| ARSXIII-611     | 1323   | 13  | 611318        | TTGTTTATGTTTATG | TTCTTTATACTCAAAATCAATAAGTGCTTATTTTAGCGAATTTTCTTCTACGAATATATATAAGTCATATCTAAGACTTCCATCCGTGCTTTATTACGTT       |
| ARSXIII-635     | 1324   | 13  | 634522        | ATTTTACTATTTGT  | AATAATGATTCTGCTTTACGCGCCTTTAAAAAGTTGGTCTTAATGTAAACATGAACCATAGCACACAATTTAAGACATCAGCTGTCAAATGACCATAAA        |
| ARSXIII-649     | 1325   | 13  | 649361        | TATTTTCATATTTGT | TGACATTTGAGAGCTTCAATTGTATAAAAGTTGCAAGATAATATATGAGGTTAGGGGAAAGCCGGATAAAGAAAAATAGAGTACTTTAAA ACTGTTTCATGGACT |
| ARSXIII-758     | 1327   | 13  | 758417        | AATTTTATGTTTTTT | TCTTCGTTTTTGCGAAAAATTCGCATGAGTGTCTCTGTATATATATAAACA AAAAGATGAAAAAAGGGGAAAGGTAGAAAAAACCGCGCTAAGTTTTTGGCAGT  |
| ARSXIII-773     | 1328   | 13  | 772677        | TTTTTTACTATTACT | TTCTTTTTCAAGCTTTTTAAGCGCCGAAATGATATTTAAGGGGAAAGTACTAAAAGGGACAGCGACGAGGATTCAGCCTGGACAGTGATAGAAAAGTTATGC     |
| ARSXIII-805     | 1329   | 13  | 805162        | ATTTTGTATTTAGT  | CTTTGTTTTCGAACTTTTATTAATATTA AAATTTTCAGTAAGTAAATTA AAAAGAACATCTTTAAAAGAGTATATTTATTGTTACATATGTTGATCTTAAAAG  |
| ARSXIII-815     | 1330   | 13  | 815391        | AATTCATGTTTTGT  | TCCTGAAATCTCGATATTTTAGTA ACTTAAAATAAAGGTAATAAAAATCATCAAAGGTTTTCCATCCAGTGGTCCAAAAAATAAATAACAGAAAGCAACA      |
| ARSXIII-898     | 1332   | 13  | 897977        | TTTTTTATGTTGGT  | TCTTGTATTTGAACAAAAAATGAATTAACCCGAACACTACCAAATCAATAGCAGAAGAAAAGAAGAAAATGATAAAAATAAAGGTGAGAACCATTTTAAA       |
| ARSXIV-29       | 1405   | 14  | 28653         | TTTTTTATTTTTAGG | TGCTAAAGGCTATTTCAACTTAAATTTAAAATTTGAAAATTTCTTGTTCATTGAATGTATAAGAACTTTTATATTCTTCAGCGTTATTAAGCGCATCTT        |
| ARSXIV-62       | 1406   | 14  | 61694         | TTTTTAATGTTTTGT | AGAGGAAAAC TTTAAAAGTTGTCATTTTTTATTTCAGATCGCAATCCATGGTTTGACACATTCTATCTTAAAAAACA AAATCTATTTATTTTGGTTTCGGCT   |
| ARSXIV-90       | 1407   | 14  | 89754         | ATTTTAAAGTTTTGT | TTGTTTTTTTTATTGTTTTGCTTCGTAGTTTCAATTTTAAACATTAATGTGTGCAAAAACTATAAGACAATGGTATACGCAAGAAAACTATAAGTAGCA        |
| ARSXIV-170      | 1411   | 14  | 169747        | AATTTAACGTTTTGT | TTCTTCCGTCATCATATCCAGTGGGAAAGGTGATTTCTAGAAAATAATGTTAACCTTCAAGGTTATGCTTTGCGATATTTGACACTTTCCAAAGAAACA        |
| ARSXIV-196      | 1412   | 14  | 196224        | TTTTTAACTTTTAGC | CGCGGTCAGTGACATTTTGGCTTTCCACCATTCCACGTCTGAAAAAATAAATAAAGAGATAAAAATATGAATTGAATATATATCAAAAATGTCTGC           |
| ARSXIV-250      | 1413   | 14  | 250464        | ATTTTACGGTTTTT  | TGAAAAAGAACCCGTTATGAAATTAAGAAAAACAGTAATTTCAAAAATGTGAAGAAATTAGGAAA CAAAATATCTTAAAAAGATTGAACGAACACTCTGTTA    |
| ARSXIV-280      | 1414   | 14  | 280062        | TTATTTATGTTTTTC | TCTCAGAAGCCATTTTTTTTTGGTTTTATGGTAAAGGCACCCTTTAAAAATAACTAAATGTTTTCTTTGAAAAATACCATACTTACA ACTAATTAATTA       |
| ARSXIV-322      | 1415   | 14  | 322000        | TTGTTTACGTTTAGG | CGAAAATACTCACCTCTTTACTATTAAAAATAATAGAAATTTATCAGAAAAAAGTCAGCAACATCAAAAAATAACAGATGGATGGCTCTAGGATAAAGGATTC    |
| ARSXIV-412      | 1417   | 14  | 412438        | TTTTTTATATTTCTG | CCCCAAAAACGTAGTTTCAAAGAAAAAGAACTATCCAAAAATAGAAAGCAAGTTATGTTTAAAGGAATTA AAAAATGTACCTATAAAGCACGTTTTTCTGATA   |
| ARSXIV-450      | 1419   | 14  | 449533        | ATATTTACATTTAGC | CCTTCTATAACCGTTTTTTTTAATTTCCCGATCTGATGAAAAGGATGCAACATCACTCTAAAAACGTTGAAAAATGGCTCCAATTCATAAGGTC ACTTTTAGTG  |
| ARSXIV-499      | 1420   | 14  | 499038        | TTCTTTATGTTTAGC | TCTTTTTTCATCACTTCTAATTCGCAAAATAGAAAGGGGAAAGGAGGACAGCAATTATGTAAAAATTAATTAGTATGTGAGTAACAAAAAGAAGAGATAACAG    |
| ARSXIV-546      | 1421   | 14  | 546145        | ATTTTACGTTTTGG  | CACGTGAATCTTCAGTAATTGATTGCACGCTTGATAAACGAAAAAACAATAAACAAATAAGGTAAGACTGCATTGTAAATCCTAGGAATGAGAAAGAACA       |
| ARSXIV-561      | 1422   | 14  | 561326        | TTGTTACATTTAGT  | TTTTGAAAAGAAGTAATCAAAAAAATAAAAAACAATAAACACATATGCAAATATGTTCTATCAAAGAGGTATATGAACTGTTTGAATGTAAATCAA           |
| ARSXIV-610      | 1424   | 14  | 609532        | TTTTTTATGTTTATT | TTCTATTACTGATTTTCAAAAAGAAAGGTA AAAAATAACTTTCAGCGGCTATACAACCATATTTAAGTAAATGCACTCAGAGAAAGTATACAAGTAA         |
| ARSXIV-636      | 1426   | 14  | 635830        | TTTTTTAATTTTAGT | TAAGTTTTCTTCTAATTTTGAATATAAAAAAGTCATCTTATAACTAGTACATTTTATATGAAGGAGTTTCTATAGGTTTTAAAGGTGTGCAAAAAA           |
| ARSXIV-692      | 1427   | 14  | 691677        | TAATTAACATTTGT  | TTCAATCTCTCACTTCGCTTAAGACCAAATAATCTCTTGAAGAAAAGAAAAC TTTAAAAGCATGCTTTTTCTTTAGCGGAAGCCATAGGTCCAAAAGGG       |
| ARSXV-36        | 1506.5 | 15  | 35713         | ATATTTATATTTAGA | GGCCTATATTCGCATCGAACTTTTCAAAATCCGCGGAAAATTA TAGAATTCATCATATATAATGAAGGAACTGTGTTCTGAAAAGAACA AAAAAGGA        |
| ARSXV-73        | 1507   | 15  | 72688         | TTTTTTACTTTTAGT | TTATTTTTTTAGACTTTAATGTGCTTCTCCCTTTTTTAAAGAGTAAATACATATTTAAAAAAGTACTATGGCTATTGCTAAAACGTGATAAAAATCAGAGC      |
| ARSXV-85        | 1508   | 15  | 85365         | ATATTTATGTTTATG | TTCCATCATGTAGAAAAGTTTCA TTTAAAAATTAATAGCCCGTCAAAAATACAAGTAAAAAATAAAAAATTA AAAAGCTCTCTATTTCTTATAAACTAAC     |
| ARSXV-114       | 1509   | 15  | 113894        | TTGTTTATATTTTTG | TACCACAAAACATCATTTAGAAAGCTGCAAAATGAAGTGAATCAGAAAAATTTAAAAATGAAACTAAAATACTAAATATTATTGTTCTTTTTCTAACAGTTGAAGT |
| ARSXV-167       | 1510   | 15  | 167002        | TTATTTATGTTTTCG | TTATATTTTTCAACATTTCCGGAAAAATAAAAAAGCGACTTTTTTGAGGATATTATCCTATCATCTGTTGAGAAAACCTAAGACAGTTAGTTTTCTATGATAATA  |
| ARSXV-278       | 1511   | 15  | 277732        | TTGTTTATCTTTTGT | TATTTAAAGCTCTACTTTTTGAAATCCAAATCGTGTTTCCCTTATGCTAAGGTGAAAAAATAATAATAAATAAAAAATGGCCAACAATAAACAATAGCCTCTC    |
| ARSXV-337       | 1513   | 15  | 337483        | CTTTTTACTTTTGT  | CACCATATTA AATCTTTAAACAAATCTAACTATGAAAAAATCCTTTAAACATATGTTAATATGTGGAAAAATAAATACTAAAAATAAAAAATCTAGA ACTGAA  |
| ARSXV-437       | 1513.5 | 15  | 436792        | ATATTTATTTTTATT | CACTTCTGAGAAAATACAAGTTGCATGCTTCAAAACTTTTACTTTTCAACAAAATATTAATCAAAAAAATAAATGAAAAAAGAAGACCATATTGAAGAAC       |
| ARSXV-490       | 1514   | 15  | 490061        | TTGTTTTTCTTTTCT | TCTTATAAATTTGTAAATTTTTTAACTGCATTAGATCATTATATTATCTTTCAAACGCCAGTCGTTTTTATTAGACCTTTATATACGTTTCAAAGTGGTT       |
| ARSXV-567       | 1516   | 15  | 566597        | AATTTTACTTTTGA  | TGCGGAATTGACTTTTCTTGAATAATACATAACTTTTCTTAAAAGAATCAAAGACAGATAAAAATTTAAGAGATATTA AATATTAGTGAGAAGCCGAGAA      |
| ARSXV-657       | 1519   | 15  | 656702        | TATTTAATGATTAGT | AAGACAAAATGACATTTAAGCATCTATAAAAATAAGAAAAATAAAAAATGAAGGGAAAAAGCTAAACACTA ACTTCTTGACCAAACAACAAGGAAAAG        |
| ARSXV-730       | 1521   | 15  | 729795        | ATTTTATATTTTTGG | CCGTTTTATGGATAGAAAACAGTCAAACGTTTCGATGGATCTTATAAAAAGTAATGATGTAAAGCAAGGTACAAAATGAAAGAAGTACGGTTTACTGTT        |
| ARSXV-767       | 1523   | 15  | 766690        | TATTTTACGTTTTTT | CATAATCATATACTTTCTGCCGAAATTTTTTGCCTTCATTATGCACACTAATGTTATTAATCAGATAAAAATA CAGAAATTTAAAATAAATACTGAGAAT      |
| ARSXV-783       | 1524   | 15  | 783387        | ATTTTAACTTTTGG  | TTTTGAAGCTCGTAATTTCAACAAAAAGAATTA AATAATCTTCAAGTCCGATAACAAGATGTAGAAAAACATCCAATGAAGTTACAAGTCAAACCATT        |
| ARSXV-874       | 1526   | 15  | 874367        | ATTTTAATATTTGTT | AGGATTCGCTTTTATTTCA CAATCAAAGGAAAACATAAAAAAAGTGTGATGCTCTACGTGAATAAAGAATTAGTGAAATAATAAAGGCAATCAGAA          |
| ARSXV-908       | 1528   | 15  | 908307        | TTGTTTATGTTTAGG | TTAACGATAGACATATTTATTTTTTTTTCTAGGAAATAAAAAATGAAGAACGGGAAAGAAAAGGAAAAATGAAAATGAAGAATATGAAGAGTAAACCTACTTA    |
| ARSXV-982       | 1529   | 15  | 981505        | TTATTTATATTTTTC | TTCAGTGAAGCGATTTTTTTTTTTTACACAGACCAAGACGGAAAAAAGTAGCTAAGGAAAGAAAACAAAATCATGAAAAAATGTGAAGTATCATGCACATC      |
| ARSXV-1054      | 1529.5 | 15  | 1053692       | TTGTTTAAATTTTGT | TCGGTCTCGGCTATATTTGGAAAGAAAAATAGCCAGTACATACTTTCTACCCTTTTCGCTCAATTTATCAATAAAAAACATTTAATCGAAAGTCATTCAA ACT   |
| ARSXVI-43       | 1604   | 16  | 43150         | TTGTTTATATTTTTG | AATTTAAACTGTTTTATAGAAATGTATGTAATATATAAAATTTTATTTTCTTTGAAAAAATGGGTATTTTTCTTTCTATTTTTTCAAGAAAATCTTCTCTGT     |



| Systematic name | proARS | Chr | Position / bp | proACS          | 100 nucleotides after 15bp proACS                                                                          |
|-----------------|--------|-----|---------------|-----------------|------------------------------------------------------------------------------------------------------------|
| ARSXVI-73       | 1605   | 16  | 73105         | TTTTTTTTGTTTTT  | CAGTTCCTTGTGTTACCTATTTTTCTTTGCGCAATTGCAAATATTATTAACCTAATTTGCGATTATTTGAGACTAAACAATAAAGACCTGGCAGTGGAGGC      |
| ARSXVI-117      | 1607   | 16  | 116593        | ATTTTTATGTTTTGT | TCCATACTAAATGCAGTTTATAAAAATTTTTCAAATGAGTCAAGCTATGTATAATCAGTGCTACAAAAATGATAAGATGCAATTGCAAGAAAAAATCCCTT      |
| ARSXVI-290      | 1614   | 16  | 289531        | TAATTAATGTTTACT | TCAGACAATAAAAACATTAAAAACAAATTTTTAGAAAAACAAAAGCTGAAAGTAAAGACTAAATATTACACAATTTATTCATACATTTCCGCCCAAACTCA      |
| ARSXVI-385      | 1618   | 16  | 384592        | AAATTTATGTTTATG | TGGCGTAAAAATATCTTTCTTCTGAAAAACACATGCAGCAGTTACTCCCATCATAAAAAGGAATTAATAAATGAATAGTATAAAACAATTATTTACTTAAATAT   |
| ARSXVI-418      | 1619   | 16  | 418178        | TTATTTACAATTAGT | TTTCTCAGAACGATATTCAATACAGTTCTCCGGATTTTTGCTTACTATATTGGCCCCAAAAAATGAAATAAAAAAAGAAAAACAAAATAATATACTTGGG       |
| ARSXVI-457      | 1620.5 | 16  | 456759        | TTTATTATTTTTTGT | TCTTATTTTCCGGCTTTCGGAAGATGTAGAGTGGTCCGGTATATTAATGCTTGAAGTAAAGACTAGGAAAACTATGGATGGGGCGGCTCTTCATTCATGACAGTAT |
| ARSXVI-512      | 1621   | 16  | 511704        | ATTTTTATGTTTTTT | GAGATATTTGAGCTTCTATTTTTTTAAAATGCCTGAATTTCCATCTTCAAAAAAACATAAAAAAGGTACTTTACCACCAAATAAATGATAACCACAA          |
| ARSXVI-564      | 1622   | 16  | 563877        | TCTTTTATATTTAGT | CCGCTTTACACCGAAAAGGTCATTTTTAAAAGGCAAGAGAACTAGGAAAAGTAAAACGTGCCCTTCAAAGCGAAGAGATGAATATATTTAGAAGTTA          |
| ARSXVI-565      | 1622.5 | 16  | 565115        | TTTTTAATTTTTAGT | TAGTAGATTTTCGTTTCGAGGCCCTAAAAATGTACCGAAAAGTCATAATAAACGGGCGGAGTCACATCGTAAGAGTAACATATAACAATATGCGAGCAGACT     |
| ARSXVI-634      | 1623   | 16  | 633921        | TTTTTATAGTTTAGT | TGGTTTTGTTTAAATTTCTAGAATCCTGTTCCGGCGCTTTTGTAAAAGTAAAAAATGAAAATTCAAACGAAATGAACCTAATCACGTTAGAATTTAAATCT      |
| ARSXVI-684      | 1624   | 16  | 684405        | TTTTTTACTTTTTGT | TTCTTTATTAATTTTTTAGTTTTTTTCATATTCTATTTTATTATAAGTAGTAATATGAAGAAATTTCCAAGCAAAGCTCAATAAAATTTATTAGCTAAA        |
| ARSXVI-696      | 1625   | 16  | 695618        | TTTTTTAATTTTCT  | GACTACTGTTTCAGCCATCAAGGTATGTCTAAATTAATAATATTCAGCATTTTCAACGTGCGCTTACCATCTGCTAATACACAGCTCCTCTGAAAGTTTCT      |
| ARSXVI-749      | 1626   | 16  | 749117        | ATTTTTAAGTTTAGT | AATCTTTTTCCGGATGAGATGTTTTGAAGAGTTTTATGCTATTAAGTAGTAATATGATTTATATATTCAAATAAAATGTAAATTTATGAAAGAAAAATAC       |
| ARSXVI-777      | 1626.5 | 16  | 777094        | TTATTTATATTTTGG | CATTAATCTTTCATCATTTTTTTCCCTCTAAGAAGCTTCTTTTCTTTTTATAAGGATAACAAAACAAAAGGAATATTGGGTGAGATGAATGGACGCGAAT       |
| ARSXVI-819      | 1627   | 16  | 819339        | ATTTTTATATTTATT | CATGATATATTAATATTAATATATATCGATGGTGAAGGACACCACACCTGTATTTCTTTGATTGAAAACAATTTTGTAAACATTGGCTGCAAAAAGTTTTTGA    |
| ARSXVI-843      | 1628   | 16  | 842851        | TTATTTAGATTTAGT | TGCGATCAAGTGTAGAAAACACATTAAAAACTATGTTGAAAAACATAAAAAAGTATTTGCGAGATCATTAAACATTAGAATTAACCTATTTATCATTAACCTATT  |
| ARSXVI-881      | 1630   | 16  | 880906        | TATTTTATGTTTAGG | TTAATAACTTTGGTAATGCTAAATTTATCTTAATTTGACGTACACAAATCTTCTACTGTTATATATGTTTTCGAATTATCTTTTAAATTTGTTGCTAAAAAA     |
| ARSXVI-933      | 1631   | 16  | 933164        | TTATTTACGTTTAGC | TTTGCTGTGGTCTTTTATACTTAATCATATAAGATACATGCATCTAGATTGCCACTATATAGCAGCACATGTTACAGTTAACTATCGATTGTCCAAAAT        |

Suppl Table 2. Nucleosome positioning datasets

|            | Author(s)                       | Journal                                | Title                                                                                                               |
|------------|---------------------------------|----------------------------------------|---------------------------------------------------------------------------------------------------------------------|
| Compiled   | Jiang & Pugh                    | Genome Biology 10:R109, 2009           | A compiled and systematic reference map of nucleosome positions across the <i>S. cerevisiae</i> genome              |
|            | 1 Mavrich et al. (Pugh)         | Genome Research 18:1073-1083, 2008     | A barrier nucleosome model for statistical positioning of nucleosomes throughout the yeast genome                   |
|            | 2 Albert et al. (Pugh)          | Nature 446:572-576, 2007               | Translational and rotational settings of H2A.Z nucleosomes across the <i>Saccharomyces cerevisiae</i> genome        |
|            | 3 Field et al. (Segal)          | PLoS Comp Biology 4(11):e1000216, 2008 | Distinct modes of regulation by chromatin encoded through nucleosome positioning signals                            |
|            | 4 Shivaswamy et al. (Iyer)      | PLoS Biology 6(3): e65, 2008           | Dynamic remodeling of individual nucleosomes across a eukaryotic genome in response to transcriptional perturbation |
|            | 5 Whitehouse et al. (Tsukiyama) | Nature 450:1031-1036, 2007             | Chromatin remodeling at promoters suppresses antisense transcription                                                |
|            | 6 Lee et al. (Nislow)           | Nature Genetics 39(10):1235-1244, 2007 | A high-resolution atlas of nucleosome occupancy in yeast                                                            |
| Individual | Eaton et al. (MacAlpine)        | Genes & Dev 24:748-753, 2010           | Conserved nucleosome positioning defines replication origins                                                        |
| Individual | Yuan et al. (Rando)             | Science 309:626-630, 2005              | Genome-scale identification of nucleosome positions in <i>S. cerevisiae</i>                                         |
| Individual | Albert et al. (Pugh)            | Nature 446:572-576, 2007               | Translational and rotational settings of H2A.Z nucleosomes across the <i>Saccharomyces cerevisiae</i> genome        |
| Individual | Lee et al. (Nislow)             | Nature Genetics 39(10):1235-1244, 2007 | A high-resolution atlas of nucleosome occupancy in yeast                                                            |
